# Supplementary material for: Ecdysone acts through cortex glia to regulate sleep in Drosophila
Source: eLife. 2023 Jan 31;12:e81723. doi: 10.7554/eLife.81723 (PMC9928426; doi:10.7554/eLife.81723)
Supplement: Figure 1—source data 1. [file elife-81723-fig1-data1.xlsx]

## Sheet: Fig2C&D
nSyb-GS>Wcs	nSy-GS>EcR RNAi #1	Wcs>EcR RNAi #1		Repo-GS>Wcs	Repo-GS>EcR RNAi #1	Wcs>EcR RNAi #1
763	491.333	864.333		691.333	362.333	987.667
685	833.667	970		524.333	578.5	810
501	590	880.333		865.667	405.667	983
787	1220.5	923		732.333	715	1031
788	118.667	903.333		938.667	826.667	1015.67
742	845	893.667		829.667	426.333	947
620	529.667	929		736	687.5	769
513	1012.67	923.667		912.667	830	984.667
777	645.667	702		844.667	745.333	1027
727	493.667	822.667		633.333	308.667	975
970		931		748	813	992
670		927.667		841.333	553.333	909.667
634	460	692		906.333	418.667	1004
625	1055.5	869.333		953	246	1013.33
783	662.333	990.333		849.333	475.333	951
768		853.667		985	381.333	886.667
				992.667	404.667	950.333
				776.333	238	889.333
				626.667	854	1064.67
685	496.667	899		836.667	722	971
816	1066.67	715			670.667	933
694	739.667	972				1017
706.667	655.667	1016				868.667
659.667	772.667	1078				964.333
951.667	662	742				882.667
593	729.333	680				897.333
854.667	784	905				1081.67
889	880	796				1041.33
1004.67	790.333	1036				940
893	583.333	756				1036.67
611.333		986				1081.67
802.667	758.667	1003
850.333	618	910
	460.333	896
	367.667	852		673	634.667	864.333
				853.667	619.333	970
710	897	729.667		935.333	259	880.333
602	760	700.333		934		923
993	723	848.333		1017	257	903.333
702	665	989		838.667	375.333	893.667
901	698	901		892.667		929
846	640			900	149.333	923.667
446	881	860		947.333	714.667	702
522	618	940.667		1003.33	424	822.667
862	932	744		644.333	33	931
790	811	921.333		938.333	316	927.667
738	743	884.333			353.333	692
860	638	1050				869.333
634	560	661.667				990.333
587	816	860.333				853.667
773	714	754
580		847
				1174.67	283	931.333
				567	384	742.667
				1020	219	972
				697.667		985
				899.667	573	1074.33
				717	570	759
				653.333	456	727
				689.667	477	899.333
				663.667	559	752.667
				1034	742	965
				659	305	779.667
				783.667	421	909.667
				917.667	142	954
				846.667	402	890.333
				1037.67	536	857
				1010.33	391	835

## Sheet: Daytime aNSE
nSyb-GS>Wcs	nSy-GS>EcR RNAi #1	Wcs>EcR RNAi #1		Repo-GS>Wcs	Repo-GS>EcR RNAi #1	Wcs>EcR RNAi #1
10	5	15.6667		9.33333	4.66667	8.33333
13.3333	12.6667	11.6667		5.66667	5.5	10.3333
6.33333	11.6667	20.3333		10.3333	24.6667	16.6667
8.66667	13	12		14	22.5	10.6667
5.33333	6.66667	10.6667		8.66667	28.3333	9
9.66667	12.3333	9.33333		8	11.6667	12.3333
9.66667	8.66667	10		15	10.5	9
6.33333	10.3333	9.33333		14.6667	31	9.66667
12.6667	4.33333	17		6	31.6667	14.3333
9	11	14.3333		8	28.6667	10.6667
13.3333	11	8.66667		19	12.6667	10.6667
8.66667	8.5	15		16	28.6667	9.33333
3	9	13.3333		7.33333	13	6
6.33333		14		11.3333	21	10
7		6		16.6667	15	4.33333
14.6667		12.6667		5.66667	11.6667	7
				17.6667	21	14.6667
				10	5.66667	9
				7.33333	29.3333	10.3333
				14	12.3333	12.6667
					12.3333	11
						9
						9
						16.6667
						9.66667
						15
						8.33333
						8
						9.33333
						9
						12.6667
						7.66667
25.6667	20	17		11.6667	13	15.6667
22	14.6667	21.6667		11.3333	7.33333	11.6667
19.3333	23	21.6667		12.3333	4	20.3333
20.6667	30.6667	14.3333		9.66667	22	12
17.6667	21.3333	10.3333		12.3333	13.3333	10.6667
13.3333	22	20		12.3333	3	9.33333
18.3333	16	16.3333		14.3333	7.33333	10
16.6667	17	13.6667		9.33333	30	9.33333
17	14.3333	21.6667		21.6667	6	17
17	14.6667	17.3333		10.6667	0.666667	14.3333
19	18	18		9.66667	23	8.66667
12.3333	18.3333	15.3333		14.3333	6	15
12.3333	29	16.6667				13.3333
15	19	15.6667				14
	15	13				6
		13.3333				12.6667
17.6667	19.6667	10.6667		14.6667	4.33333	17
15.6667	16.3333	13.3333		24.6667	14.3333	21.6667
20.6667	10.6667	14.6667		9.33333	2.66667	21.6667
17.3333	11	15.3333		20.3333	17.5	14.3333
21.3333	9.33333	15.3333		9	13	10.3333
19	9.33333	17		12.6667	14.3333	20
20.6667	7.33333	10.3333		6.33333	10.3333	16.3333
19	13.6667	14.3333		21.6667	15.6667	13.6667
20.6667	20.3333	13.6667		21.3333	20.3333	21.6667
17.6667	21.3333	12.3333		11	17	17.3333
15.3333	18	12.3333		22.3333	16	18
17.6667	10	15.3333		15.6667	15.6667	15.3333
16	13	14.3333		12	3	16.6667
17.6667	16	13		21.3333	9.66667	15.6667
19.6667	21	14.6667		10.3333	13.6667	13
16.6667		11.6667		17.3333	4.66667	13.3333

## Sheet: Daytime aLSE
nSyb-GS>Wcs	nSy-GS>EcR RNAi #1	Wcs>EcR RNAi #1		Repo-GS>Wcs	Repo-GS>EcR RNAi #1	Wcs>EcR RNAi #1
25.6107	2.96667	18.3384		17.0299	4.88095	46.5926
12.3734	39.5009	31.0023		13.6071	65.0833	32.1364
12.5667	15.1928	13.62		32.0603	5.71347	8.10741
21.123	54.4167	28.7986		13.8302	20.4849	31.2697
24.5444	2.82778	30.1052		41.7546	11.8577	43.1111
30.5449	38.0259	32.337		30.25	14.5976	32.786
10.6343	19.4349	32.8901		12.0614	37.9952	36.7685
7.32381	62.5395	36.9192		21.5879	12.7671	13.4274
12.6874	66.1667	10.9307		53.2798	9.91079	29.1396
7.51944	3.54444	16.4454		12.2672	4.24565	33.213
23.0865	9.43175	36.9751		9.3612	13.3736	36.3202
10.1508	96.8452	19.2736		17.2323	6.73918	39.6389
101.333	14.4667	13.5547		71.2071	11.0006	70.8889
17.4028		16.5785		36.3065	4.66667	33.1407
36.2037		70.6865		19.9392	8.04762	88.7333
9.99747		19.3039		72.275	5.87939	70.4833
				21.2818	5.4782	14.9518
				21.5004	4.5303	36.5185
6.6882	6.90341	19.0675		21.8619	21.5146	28.1453
8.70988	32.8843	11.2778		27.4661	21.4319	31.2899
8.47077	9.91009	15.1778			15.7763	33.2745
5.09964	7.59167	28.0481				41.3283
4.68518	10.9853	41.4242				43.4416
30.3729	12.8851	14.2451				12.0074
5.91612	11.0078	14.8903				41.9184
15.6243	19.6127	25.9024				15.6013
19.3137	21.8124	9.63611				28.7222
30.9054	21.6165	18.7631				61.0191
17.3616	5.0944	18.2624				45.7898
8.51282	17.5977	25.6618				38.5648
12.0128	3.68736	21.9993				30.6688
16.4197	7.99604	27.1213				59.2361
	4.23718	21.0778
		18.6017		12.4718	11.3554	18.3384
				22.8286	2.32576	31.0023
11.497	21.0488	26.7305		26.0465	4.41667	13.62
14.5984	18.2568	20.0069		32.4156	4.54739	28.7986
16.3837	20.7635	22.5397		36.875	3.96944	30.1052
13.7795	22.1788	28.8458		22.9441	211	32.337
13.2268	30.4926	22.6678		20.2475	2.71111	32.8901
20.7	33.0664	28.7059		30.7833	7.09075	36.9192
6.92412	56.502	32.8775		18.6132	5.16667	10.9307
9.06111	59.8469	30.1525		39.859	1.5	16.4454
16.205	23.7005	21.7064		4.97222	4.21038	36.9751
13.2093	12.9632	29.7268		22.0413	6.75	19.2736
8.38095	13.8241	30.9883				13.5547
22.5537	27.5397	31.3708				16.5785
11.202	20.3333	20.2152				70.6865
8.11667	23.5863	45.1762				19.3039
12.5816	14.2023	26.7556
12.6333		28.1469
				41.225	5.01852	19.0675
				7.12787	3.11389	11.2778
				45.8359	3.56667	15.1778
				8.93484	34.4286	28.0481
				34.6818	6.70758	41.4242
				7.71667	4.23248	14.2451
				6.23611	6.46032	14.8903
				6.26706	4.78161	25.9024
				9.25298	3.09312	9.63611
				46.5833	11.5342	18.7631
				7.05588	4.28418	18.2624
				16.5953	3.85032	25.6618
				21.8745	2.47619	21.9993
				9.2115	2.24762	27.1213
				42.6162	7.6303	21.0778
				24.9501	3.2	18.6017

## Sheet: Nighttime aNSE
nSyb-GS>Wcs	nSy-GS>EcR RNAi #1	Wcs>EcR RNAi #1		Repo-GS>Wcs	Repo-GS>EcR RNAi #1	Wcs>EcR RNAi #1
8.33333	9	5.33333		9	14.6667	2.66667
11	13.3333	3.66667		10	7	1.66667
14.6667	15.3333	5.66667		8.66667	32	4
4.33333	5.5	5		11	6.5	1
5.33333	13	3.33333		4.66667	20	5.66667
11	8	4.66667		4.33333	22.3333	3
9	10.3333	4.66667		5.33333	2.5	5
12	8	3.66667		5.66667	28.6667	6.33333
8.66667	16.6667	11.6667		2.66667	27.3333	4
6	9.66667	5		9.33333	34.6667	3
3.33333	19	3.66667		8	6	7
5.66667	5.5	3.66667		10.3333	32.3333	8.33333
13	14.3333	6.66667		5.66667	21	4.33333
9.66667		5.33333		6.66667	34	3.33333
5.66667		2		13	23.3333	4
6.33333		6		4	26.3333	10
				5.33333	34	2
				4.66667	22.3333	4
6	13.6667	5.66667		10	30.3333	8
2	9.66667	18		11	14.3333	2
6.66667	10.6667	4			17.3333	5
5.66667	13.6667	5.66667				5
9.33333	9.33333	4				4.5
12.3333	13.3333	15.3333				2
5.33333	13.6667	13.6667				8.33333
4	5.33333	11.3333				3
13	7.66667	11.6667				2.66667
8.33333	5	7				2.33333
5.33333	13.3333	22.6667				3
10.6667	6.66667	9.66667				2.33333
2.66667	14.3333	7.33333				5.66667
2.33333	16.6667	8				2.66667
	10.6667	4.66667
		10
16	12.3333	18.6667		11.6667	20	5.33333
10.6667	9.33333	15		6.66667	16	3.66667
8.66667	7	11		4	22.3333	5.66667
9.33333	9.66667	6.33333		2	22.3333	5
2.33333	10.6667	6.66667		5	24	3.33333
15.3333	7.33333	4		8.33333	1	4.66667
14.6667	6.66667	7.66667		5	25.3333	4.66667
15.6667	9.66667	7.33333		9	23	3.66667
9.66667	10.3333	15		10.3333	17.6667	11.6667
11	13.3333	9.66667		2.66667	8.66667	5
10.3333	17.6667	13.6667		12.3333	31.6667	3.66667
17.3333	15.6667	10		1.66667	24	3.66667
10	16.6667	17				6.66667
7.66667	14.3333	21				5.33333
13	12	18				2
8.66667		11.6667				6
				2.66667	22.6667	5.66667
				15.6667	23.6667	18
				2	21.3333	4
				17.3333	10.5	5.66667
				5.33333	19.6667	4
				10.3333	14.3333	15.3333
				8	14	13.6667
				10.3333	21.6667	11.3333
				13.3333	17	11.6667
				11.6667	9	7
				9.66667	17.6667	22.6667
				10.3333	16.6667	9.66667
				3.66667	17	7.33333
				6.33333	19.3333	8
				4.33333	18.3333	4.66667
				9.66667	22	10

## Sheet: Fly lines
Fly lines used for screenning
Eip75B	EipEip75bJF02557	UAS-E75 RNAi (Eip75bJF02557)
	v44851	w1118; P{GD1434}v44851
Eip78C	44390	w[*]; P{y[+t7.7] w[+mC]=UAS-Eip78C.miRNA}attP16/CyO
Hr3	44399	w[*]; P{y[+t7.7] w[+mC]=UAS-Hr3.miRNA}attP16
EcR	v37058	w1118; P{GD1428}v37058
	v37059	w1118; P{GD1428}v37059
Hr96	44395	w[*]; P{y[+t7.7] w[+mC]=UAS-Hr96.miRNA}attP16
Hnf4	44398	w[*]; P{y[+t7.7] w[+mC]=UAS-Hnf4.miRNA}attP16/CyO
usp	27258	y[1] v[1]; P{y[+t7.7] v[+t1.8]=TRiP.JF02546}attP2
	36729	y[1] sc[*] v[1]; P{y[+t7.7] v[+t1.8]=TRiP.HMS01620}attP2
Hr78	44393	w[*]; P{y[+t7.7] w[+mC]=UAS-Hr78.miRNA}attP16
tll	27242	y[1] v[1]; P{y[+t7.7] v[+t1.8]=TRiP.JF02545}attP2
	34329	y[1] sc[*] v[1]; P{y[+t7.7] v[+t1.8]=TRiP.HMS01316}attP2
Hr51	39032	y[1] sc[*] v[1]; P{y[+t7.7] v[+t1.8]=TRiP.HMS01951}attP2
Dsf	29373	y[1] v[1]; P{y[+t7.7] v[+t1.8]=TRiP.JF02537}attP2
	41707	y[1] v[1]; P{y[+t7.7] v[+t1.8]=TRiP.HMS02272}attP40
Hr83	44397	w[*]; P{y[+t7.7] w[+mC]=UAS-Hr83.miRNA}attP16
svp	44394	w[*]; P{y[+t7.7] w[+mC]=UAS-svp.miRNA}attP16
ERR	44391	w[*]; P{y[+t7.7] w[+mC]=UAS-ERR.miRNA}attP16/CyO
Hr38	44396	w[*]; P{y[+t7.7] w[+mC]=UAS-Hr38.miRNA}attP16/CyO
ftz-f1	27659	y[1] v[1]; P{y[+t7.7] v[+t1.8]=TRiP.JF02738}attP2
	33625	y[1] v[1]; P{y[+t7.7] v[+t1.8]=TRiP.HMS00019}attP2/TM3, Sb[1]
Hr39	33624	y[1] v[1]; P{y[+t7.7] v[+t1.8]=TRiP.HMS00018}attP2/TM3, Sb[1]
	27086	y[1] v[1]; P{y[+t7.7] v[+t1.8]=TRiP.JF02432}attP2
Hr4	44392	w[*]; P{y[+t7.7] w[+mC]=UAS-Hr4.miRNA}attP16

## Sheet: Data
Genotype	N	Total sleep mean	Total sleep sd	Day sleep mean	Day sleep sd	Night sleep mean	Night sleep sd
nSyb-GS>Dsf #1	32	740.615	118.174	235.438	126.843	505.177	101.451
nSyb-GS>Dsf #2	16	634.578	127.042	154.859	76.5829	479.719	80.9635
nSyb-GS>E75 #1	47	433.142	145.705	80.2979	64.6813	352.844	101.259
nSyb-GS>E75 #2	32	590.76	140.983	137.427	87.8283	453.333	81.1364
nSyb-GS>E78	6	552.25	100.707	112.958	45.0836	439.292	102.843
nSyb-GS>EcR #1	41	679.911	176.004	238.52	118.326	441.39	92.7013
nSyb-GS>EcR #2	11	653.273	165.114	186.333	86.1724	466.939	112.717
nSyb-GS>Err	23	665.123	208.87	117.779	137.781	547.344	101.698
nSyb-GS>Ftz-f1 #1	11	688.955	219.23	213.341	140.592	475.614	124.243
nSyb-GS>Ftz-f1 #2	31	636.167	190.645	198.895	117.631	437.272	116.061
nSyb-GS>Hnf4	21	730.952	112.371	193.016	108.413	537.937	90.4167
nSyb-GS>Hr3	30	536.442	138.597	115.492	82.9347	420.95	85.9534
nSyb-GS>Hr38	16	604.708	168.282	159.062	110.284	445.646	98.3635
nSyb-GS>Hr39 #1	31	574.57	138.683	93.7312	98.4121	480.839	102.67
nSyb-GS>Hr39 #2	16	696.125	194.006	229.641	130.129	466.484	91.475
nSyb-GS>Hr51	26	668.462	152.73	202.821	144.19	465.641	125.753
nSyb-GS>Hr78	28	621.973	130.171	162.518	72.419	459.455	103.154
nSyb-GS>Hr83	38	680.743	147.489	179.513	92.1605	501.23	83.6765
nSyb-GS>Hr96	30	682.156	187.136	150.422	134.457	531.733	80.9218
nSyb-GS>Svp	16	506.219	66.3182	65.5781	45.7382	440.641	41.1451
nSyb-GS>Tll #1	32	632.062	137.781	138.167	80.1309	493.896	97.3174
nSyb-GS>Tll #2	16	656.281	120.923	204.5	70.1067	451.781	60.8701
nSyb-GS>Usp #1	30	672.469	188.743	154.575	85.2682	517.894	126.485
nSyb-GS>Usp #2	28	663.702	176.721	177.643	103.781	486.06	118.231
nSyb-GS control	124	751.43	161.491	225.11	98.2128	526.32	98.9499
Repo-GS>Dsf #1	16	564.25	132.017	197.458	112.147	366.792	79.9154
Repo-GS>Dsf #2	16	564.859	135.355	119.781	79.0187	445.078	70.8719
Repo-GS>E75 #1	48	472.264	148.315	106.799	82.0988	365.465	92.8339
Repo-GS>E75 #2	31	554.419	163.641	159.323	113.028	395.097	78.3072
Repo-GS>EcR #1	57	460.497	197.882	119.667	110.752	340.83	123.076
Repo-GS>EcR #2	21	413	182.833	109.286	101.278	303.714	107.798
Repo-GS>Err	17	521.029	103.535	114.24	42.7339	406.789	92.9195
Repo-GS>Ftz-f1 #1	15	613.55	142.142	118.5	99.0797	495.05	63.832
Repo-GS>Ftz-f1 #2	32	518.815	189.781	127.688	127.689	391.128	87.2278
Repo-GS>Hnf4	27	684.852	148.274	182.852	83.9905	502	117.136
Repo-GS>Hr3	25	521.987	86.8643	77.2267	37.7736	444.76	76.5014
Repo-GS>Hr38	12	686.361	65.5438	153.139	56.1733	533.222	33.3498
Repo-GS>Hr39 #1	31	537.807	150.392	109.032	83.0698	428.774	99.8432
Repo-GS>Hr39 #2	15	565.533	128.874	115.75	88.2556	449.783	60.8655
Repo-GS>Hr51	32	558.31	133.956	117.146	81.8944	441.164	81.8063
Repo-GS>Hr78	32	615.099	173.498	143.328	94.4789	471.771	100.332
Repo-GS>Hr83	46	574.899	101.214	94.4094	56.5425	480.489	74.7677
Repo-GS>Hr96	16	667.521	108.888	127.812	65.279	539.708	78.1933
Repo-GS>Svp	16	538.047	117.273	116.375	54.5418	421.672	74.9078
Repo-GS>Tll #1	31	593.624	108.921	74.7204	36.5733	518.903	90.191
Repo-GS>Tll #2	16	512.297	113.256	137.531	114.113	374.766	48.0825
Repo-GS>Usp #2	32	599.698	200.93	144.844	105.718	454.854	124.242
Repo-GS control	144	728.906	160.484	197.916	111.563	530.991	76.8423
UAS control of Dsf #1	31	856.409	154.127	295.581	81.688	560.828	120.023
UAS control of Dsf #2	15	1005.37	117.002	431.217	99.2094	574.15	49.2192
UAS control of E75 #1	48	791.014	105.234	238.604	69.6791	552.41	77.8418
UAS control of E75 #2	32	715.948	129.367	265.74	72.7311	450.208	76.4448
UAS control of E78	16	732.703	143.501	247.141	78.1111	485.562	86.3021
UAS control of EcR #1	78	906.274	100.648	310.731	69.4145	595.543	67.5907
UAS control of EcR #2	28	820.191	119.762	558.286	322.281	549.488	90.6061
UAS control of Err	27	866.034	115.094	270.13	103.665	595.904	64.6432
UAS control of Ftz-f1	15	888.15	107.818	329.667	73.1234	558.483	52.1168
UAS control of Ftz-f1 #2	16	706.688	159.399	265.281	98.5779	441.406	77.9257
UAS control of Hnf4	19	874	116.285	342.544	63.484	531.456	81.5441
UAS control of Hr3	32	783.633	116.595	271.729	67.1247	511.904	78.466
UAS control of Hr39 #1	32	808.052	191.506	247.802	81.5509	560.25	134.305
UAS control of Hr39 #2	16	757.016	119.138	267.953	108.123	489.062	52.6156
UAS control of Hr4	16	942.917	95.0627	332.688	65.9098	610.229	50.2826
UAS control of Hr51	32	824.797	149.997	296.148	121.044	528.648	80.5208
UAS control of Hr78	32	762.628	94.9402	241.654	98.0861	520.974	91.6289
UAS control of Hr83	26	696.353	162.341	205.074	113.688	491.279	80.0284
UAS control of Hr96	32	879.427	118.03	275.302	87.9878	604.125	45.9702
UAS control of Svp	16	733.422	166.347	248.688	76.9555	484.734	114.554
UAS control of Tll #1	32	876.083	134.764	264.344	76.7424	611.74	74.514
UAS control of Tll #2	16	863.281	92.7492	358.406	46.7926	504.875	76.9219
UAS control of Usp #1	32	830.747	159.011	295.383	70.4809	535.365	136.776
UAS control of Usp #2	16	834.208	180.855	329.229	93.1387	504.979	107.53
UAS control of Hr83	16	823.125	86.0424	206.083	74.9467	617.042	42.3902

## Sheet: nSyb
Genotype	N	sleep TD (E-Gal4)	sleep RD (E-Gal4)	sleep RN (E-Gal4)	sleep TD (E-UAS)	sleep RD (E-UAS)	sleep RN (E-UAS)
nSyb-GS>E75 #1	47	-318.288	-144.812	-173.476	-357.872	-158.306	-199.566
nSyb-GS>Hr3	30	-214.988	-109.619	-105.37	-247.191	-156.238	-90.9536
nSyb-GS>Svp	16	-245.211	-159.532	-85.6793	-227.203	-183.109	-44.0938
nSyb-GS>E78	6	-199.18	-112.152	-87.0282	-180.453	-134.182	-46.2708
nSyb-GS>Hr39 #1	31	-176.86	-131.379	-45.4812	-182.446	-174.222	-8.2238
nSyb-GS>E75 #2	32	-160.67	-87.6831	-72.9866	-125.188	-128.312	3.125
nSyb-GS>Hr38	16	-146.722	-66.0477	-80.6741	-203.344	-88.7396	-114.604
nSyb-GS>Hr78	28	-129.457	-62.5923	-66.8645	-140.654	-79.1358	-61.5186
nSyb-GS>Tll #1	32	-119.368	-86.9435	-32.4241	-244.021	-126.177	-117.844
nSyb-GS>Dsf #2	16	-116.852	-70.2508	-46.6011	-370.789	-276.357	-94.4312
nSyb-GS>Ftz-f1 #2	31	-115.263	-26.215	-89.0484	-70.5208	-66.3861	-4.1347
nSyb-GS>EcR #2	11	-98.1574	-38.7769	-59.3805	-166.918	-371.952	-82.5487
nSyb-GS>Tll #2	16	-95.1489	-20.6102	-74.5387	-207	-153.906	-53.0938
nSyb-GS>Usp #2	28	-87.7277	-47.4673	-40.2604	-170.506	-151.586	-18.9197
nSyb-GS>Err	23	-86.3069	-107.331	21.0243	-200.911	-152.351	-48.5601
nSyb-GS>Hr51	26	-82.9686	-22.2897	-60.6789	-156.335	-93.3279	-63.0074
nSyb-GS>Usp #1	30	-78.9607	-70.5352	-8.4255	-158.278	-140.808	-17.4702
nSyb-GS>EcR #1	41	-71.5195	13.4101	-84.9297	-226.363	-72.2104	-154.153
nSyb-GS>Hr83	38	-70.6867	-45.597	-25.0896	-15.6092	-25.5606	9.9515
nSyb-GS>Hr96	30	-69.2745	-74.688	5.4134	-197.272	-124.88	-72.3917
nSyb-GS>Ftz-f1 #1	11	-62.4756	-11.7693	-50.7063	-199.196	-116.326	-82.8697
nSyb-GS>Hr39 #2	16	-55.3051	4.53042	-59.8355	-246.792	-103.047	-143.745
nSyb-GS>Hnf4	21	-20.4777	-32.0943	11.6166	-143.048	-149.528	6.4804
nSyb-GS>Dsf #1	32	-10.8155	10.3273	-21.1428	-115.794	-60.1431	-55.6509
E-Gal4 columns are for the subtracted mean values between experimental groups and their Gal4 control groups, and E-UAS columns are 607 for the subtracted mean values between experimental groups and their UAS RNAi control groups. TD, total sleep. RD, daytime sleep. RN, 608 nighttime sleep. N is the number of alive flies for the experimental group. Fly lines bold in the RNA lines column are ecdyson…

## Sheet: Repo
Genotype	N	sleep TD (E-Gal4)	sleep RD (E-Gal4)	sleep RN (E-Gal4)	sleep TD (E-UAS)	sleep RD (E-UAS)	sleep RN (E-UAS)
Repo-GS>EcR #2	21	-315.906	-51.1987	-227.276	-407.19	-449	-245.774
Repo-GS>EcR #1	57	-268.409	-40.8177	-190.16	-445.776	-191.064	-254.712
Repo-GS>E75 #1	48	-256.642	-53.6858	-165.525	-318.75	-131.806	-186.944
Repo-GS>Tll #2	16	-216.609	-22.9532	-156.225	-350.984	-220.875	-130.109
Repo-GS>Ftz-f1 #2	32	-210.091	-32.7969	-139.863	-187.872	-137.594	-50.2786
Repo-GS>Err	17	-207.877	-46.2442	-124.201	-345.005	-155.889	-189.115
Repo-GS>Hr3	25	-206.92	-120.689	-86.2307	-261.646	-194.502	-67.1437
Repo-GS>Hr39 #1	31	-191.1	-51.4521	-102.216	-270.246	-138.77	-131.476
Repo-GS>Svp	16	-190.859	-44.1094	-109.319	-195.375	-132.312	-63.0625
Repo-GS>E75 #2	31	-174.487	-1.16182	-135.894	-161.529	-106.417	-55.1115
Repo-GS>Hr51	32	-170.596	-43.3386	-89.8266	-266.487	-179.003	-87.4843
Repo-GS>Dsf #1	16	-164.656	36.9739	-164.199	-292.159	-98.1223	-194.036
Repo-GS>Dsf #2	16	-164.047	-40.7032	-85.9126	-440.507	-311.435	-129.072
Repo-GS>Hr39 #2	15	-163.373	-44.7344	-81.2074	-191.482	-152.203	-39.2792
Repo-GS>Hr83	46	-154.008	-66.075	-50.5016	-121.454	-110.664	-10.7897
Repo-GS>Tll #1	31	-135.283	-85.764	-12.0875	-282.46	-189.623	-92.8364
Repo-GS>Usp #2	32	-129.208	-15.6407	-76.1365	-234.51	-184.385	-50.125
Repo-GS>Ftz-f1 #1	15	-115.356	-41.9844	-35.9407	-274.6	-211.167	-63.4333
Repo-GS>Hr78	32	-113.807	-17.1563	-59.2199	-147.529	-98.3255	-49.2032
Repo-GS>Hr96	16	-61.3855	-32.6719	8.7176	-211.906	-147.49	-64.4167
Repo-GS>Hnf4	27	-44.0544	22.3675	-28.9907	-189.148	-159.692	-29.4561
E-Gal4 columns are for the subtracted mean values between experimental groups and their Gal4 control groups, and E-UAS columns are 607 for the subtracted mean values between experimental groups and their UAS RNAi control groups. TD, total sleep. RD, daytime sleep. RN, 608 nighttime sleep. N is the number of alive flies for the experimental group. Fly lines bold in the RNA lines column are ecdyson…
