# Supplementary material for: Ecdysone acts through cortex glia to regulate sleep in Drosophila
Source: eLife. 2023 Jan 31;12:e81723. doi: 10.7554/eLife.81723 (PMC9928426; doi:10.7554/eLife.81723)
Supplement: Figure 2—source data 2. [file elife-81723-fig2-data2.xlsx]

## Sheet: FigS1C&D
nSyb-GS control	nSyb-GS>E75 RNAi	UAS control		Repo-GS control	Repo-GS>E75 RNAi	UAS control
771.333	652	882		568	606.333	882
673.667	383	742		850	286.667	742
585	492	823		914	739	823
761.333	353	744		977	246.333	744
761.333	488	998		1133	691.667	998
751.333	151	926		804	568.333	926
564.333	391	958		841	660.333	958
522.333	405	889		987	353	889
764	194	894		957	463.333	894
666	323	825		1066	448.333	825
975.333	213	1041		636	626.667	1041
690.333	573	869		935	428.333	869
613	551	825			362.333	825
710		886			153	886
814.333	431	894			265.667	894
781.667	315	994			197.333	994
685	379.667	765.333		1152	336	765.333
816	540.333	725		528	551	725
694	280.667	639.333		1011	701	639.333
706.667	588.667	705		702	456	705
659.667	257	612.667		842	300	612.667
951.667	374.667	701		646	550	701
593	554	594.667		756	491	594.667
854.667	491.333	739.333		764	572	739.333
889	230.333	759.667		635	317	759.667
1004.67	495.333	655		1160	554	655
893	458	879.333		597	204	879.333
611.333	493.333	671.333		771	450	671.333
802.667	416.333	816.333		908	590	816.333
850.333	370.667	700		849	291	700
	462.667	739.333		1080	481	739.333
	313.667	790.333		1054	614	790.333
710	184	931		936.667	619.667	931
602	598	815		716.667	330	815
993	431	1035		774.333	409.333	1035
702	385	864		622.333	185.333	864
901	270	835		685.333	480	835
846	450	791		695.333	479.667	791
446	209	742		749.333	322	742
522	835	671		565	512.667	671
862	572	678		446.667	641.333	678
790	624	825		567.333	568.333	825
738	210	761		791	620.667	761
860	323	727		824.333	291.667	727
634	354	585		801	609	585
587	610	646		570.667	638.667	646
773	605	1000		610.667	356	1000
580	416	601		790	511.667	601

## Sheet: Daytime aSBL
nSyb-GS control	nSyb-GS>E75 RNAi	UAS control		Repo-GS control	Repo-GS>E75 RNAi	UAS control
18.0855	13.3614	26.1698		10.9833	46.7266	26.1698
11.5963	8.89524	12.3788		22.3434	8.23205	12.3788
13.1726	8.73611	11.8857		18.1949	32.0034	11.8857
18.6167	18.7107	10.3501		35.5398	5.55952	10.3501
21.4185	9.52778	36.3049		33.2083	110.217	36.3049
12.1053	7.3	22.5569		24.958	10.6154	22.5569
10.5625	7.54167	25.9978		24.112	15.9059	25.9978
4.93651	10.6431	22.8787		37.588	2.5	22.8787
11.0463	2	18.302		20.5422	5.91667	18.302
6.25556	6.15741	10.4759		60.3564	13.4141	10.4759
21.907	2.63492	36.224		7.68254	8.98693	36.224
11.6532	8.52879	12.7348		26.9589	4.11534	12.7348
61.45	9.58543	18.6373			3.2381	18.6373
16.6	12.1889	13.9016			2.275	13.9016
31.337	3.09524	24.2615			3.77778	24.2615
9.22889		36.6919			6.41667	36.6919
6.6882	4.78977	6.38406		41.225	4.3869	6.38406
8.70988	4.35796	18.9091		7.12787	8.13749	18.9091
8.47077	4.29829	9.59899		45.8359	22.8769	9.59899
5.09964	4.22727	11.6765		8.93484	5.92308	11.6765
4.68518	3.57222	10.4813		34.6818	4.92402	10.4813
30.3729	3.57335	11.2446		7.71667	6.14576	11.2446
5.91612	3.5576	10.4246		6.23611	3.42377	10.4246
15.6243	2.95833	17.5259		6.26706	9.65602	17.5259
19.3137	2.30556	12.154		9.25298	4.22487	12.154
30.9054	2.74466	10.0257		46.5833	11.4755	10.0257
17.3616	4.29748	17.6214		7.05588	3.50833	17.6214
8.51282	3.84306	9.33351		16.5953	6.03547	9.33351
12.0128	4.71444	13.4244		21.8745	5.00467	13.4244
16.4197	5.07056	7.57998		9.2115	3.53069	7.57998
	3.39352	12.3111		42.6162	2.50092	12.3111
	2.73413	16.2502		24.9501	5.23968	16.2502
11.497	1.80476	24.0028		26.9125	7.42534	24.0028
14.5984	4.60494	21.5998		13.1468	11	21.5998
16.3837	4.72902	31.6362		28.7833	6.74405	31.6362
13.7795	4.69747	20.8086		10.1591	5.39286	20.8086
13.2268	4.98095	19.6998		8.25238	10.2934	19.6998
20.7	7.87037	28.0444		16.6597	4.18379	28.0444
6.92412	9.87879	13.0017		9.34349	6.04048	13.0017
9.06111	19.1578	30.5051		3.30159	9.34259	30.5051
16.205	7.93176	7.41048		8.5	15.9666	7.41048
13.2093	5.72269	15.8662		4.54813	9.10556	15.8662
8.38095	6.64881	15.2114		11.496	9.9213	15.2114
22.5537	3.27814	18.7476		15.2702	3.19192	18.7476
11.202	5.43506	12.7778		21.8606	6.03838	12.7778
8.11667	12.4878	15.3309		8.2463	9.71588	15.3309
12.5816	5.45277	28.3571		9.88636	5.16667	28.3571
12.6333	8.03016	25.5734		20.6098		25.5734

## Sheet: Daytime aSBN
nSyb-GS control	nSyb-GS>E75 RNAi	UAS control		Repo-GS control	Repo-GS>E75 RNAi	UAS control
13.6667	13	10.6667		13	8	10.6667
13.3333	8	8.66667		14.3333	10.6667	8.66667
9.66667	10	15		12	10.3333	15
11	8	18.3333		9.33333	4	18.3333
9.33333	9.66667	9.33333		12	4	9.33333
14.3333	5.33333	11		12	16	11
10.6667	9.33333	13.6667		13.3333	15	13.6667
6.33333	13.6667	15		8.33333	6.66667	15
10.3333	0.333333	16		19	4.33333	16
11.3333	5.66667	19.3333		8	11.3333	19.3333
15.3333	3.66667	10		12	13.6667	10
8.66667	19	18.3333		13	11	18.3333
3.66667	15	12			7	12
8.33333	7	16.6667			5.33333	16.6667
8	7	11			3	11
19		11.6667			3.33333	11.6667
25.6667	13	23.3333		14.6667	16	23.3333
22	12	10.3333		24.6667	23.3333	10.3333
19.3333	15	22.6667		9.33333	13.6667	22.6667
20.6667	13.3333	20.3333		20.3333	12.6667	20.3333
17.6667	10	17.3333		9	10	17.3333
13.3333	13.3333	18.3333		12.6667	19.3333	18.3333
18.3333	12.3333	17.6667		6.33333	15.6667	17.6667
16.6667	8.33333	16.6667		21.6667	24.6667	16.6667
17	4.66667	19		21.3333	31	19
17	17	19.6667		11	16.3333	19.6667
19	20	17.6667		22.3333	17.6667	17.6667
12.3333	12.6667	15.6667		15.6667	16	15.6667
12.3333	16	21.3333		12	31	21.3333
15	20.3333	17.6667		21.3333	14.6667	17.6667
	13.6667	17		10.3333	8	17
	11.6667	19.3333		17.3333	21.6667	19.3333
17.6667	10	15.6667		14	16.3333	15.6667
15.6667	28.6667	11.3333		11.6667	1.33333	11.3333
20.6667	21.3333	12.6667		9.33333	10	12.6667
17.3333	20.3333	15.3333		9	9.66667	15.3333
21.3333	7	18.3333		14.6667	11.6667	18.3333
19	20.6667	13.3333		11.6667	11.6667	13.3333
20.6667	8.66667	17.6667		22.6667	9.33333	17.6667
19	18.3333	9.33333		13	8.66667	9.33333
20.6667	31.3333	18		2	15.3333	18
17.6667	15	17.6667		9.33333	15.3333	17.6667
15.3333	13	18.6667		19	18	18.6667
17.6667	16.3333	15.3333		17	7.66667	15.3333
16	12	9		12.3333	19	9
17.6667	16.6667	15.6667		7.66667	18.3333	15.6667
19.6667	29	12.3333		12.6667	4.66667	12.3333
16.6667	14.3333	13.6667		12.6667		13.6667

## Sheet: Nighttime aSBL
nSyb-GS control	nSyb-GS>E75 RNAi	UAS control		Repo-GS control	Repo-GS>E75 RNAi	UAS control
96.7667	35.5667	174.067		51.4313	51.3333	174.067
44.5025	26.8669	98.0042		227.861	17.8043	98.0042
91.7356	49.6019	45.8246		91.1292	53.6813	45.8246
151.222	35.3558	86.5308		552.5	26.6885	86.5308
120.389	45.3885	80.1884		253.611	51.0542	80.1884
280.294	12.2653	266.778		287.233	78.8625	266.778
93.8667	20.2566	71.2205		316.178	65.4583	71.2205
52.404	85.3927	138.806		384.6	35.2096	138.806
77.25	44.6407	182.88		37.8588	25.2814	182.88
100.8	18.279	121.556		553	57.1389	121.556
257.024	20.3825	240.2		87.4889	19.4034	240.2
142.861	39.1516	123.793		426.5	28.2643	123.793
63.6083	54.5608	176			31.1444	176
72.6871	24.1941	282.083			17.7671	282.083
84.588	21.2204	215.083			31.8889	215.083
142.75		344.833			21.0194	344.833
107.796	41.6435	105.374		278.083	26.0961	105.374
387.333	23.2098	34.7026		26.8349	20.6805	34.7026
92	30.6517	15.6499		411.111	22.6955	15.6499
173.023	14.5717	22.2108		33.8146	22.601	22.2108
117.251	27.6148	17.2188		155.889	17.6024	17.2188
67.0611	39.0742	27.8026		85.3439	23.6286	27.8026
125.236	36.914	16.5797		313.939	18.1302	16.5797
284.3	23.2125	27.3775		55.2934	26.4913	27.3775
43.8554	90.7042	48.117		37.2667	13.2088	48.117
139.341	43.0668	26.5951		149.974	25.5924	26.5951
269	36.4219	54.9598		75.5185	16.2681	54.9598
48.1944	29.1667	30.1439		95.7719	29.9936	30.1439
358.972	19.3653	34.2975		219.833	21.4746	34.2975
357.083	16.2804	94.3889		113.684	15.5664	94.3889
	17.1019	62.8		144.783	27.2639	62.8
	47.8124	28.768		105.8	30.0369	28.768
31.718	15.3397	155.833		130.639	39.1306	155.833
48.9527	46.0704	72.3252		96.3714	31.4381	72.3252
106.033	22.3561	170.806		89.3393	17.9789	170.806
246.633	26.9208	31.9423		85.4825	7.32372	31.9423
477.4	33.5198	32.9939		94.7273	21.4111	32.9939
28.9069	16.6723	26.036		74.9885	33.7778	26.036
27.7526	25.925	57.1957		159.333	15.3324	57.1957
25.9849	44.9414	25.5292		43.7312	23.6684	25.5292
62.4744	28.7401	26.9878		42.9637	36.4693	26.9878
49.8288	35.4989	56.6151		62.053	30.1383	56.6151
61.6197	11.3735	19.9401		118.894	31.0687	19.9401
28.1094	42.8651	27.0616		86.2719	19.3582	27.0616
45.2571	42.0741	35.3081		57.563	61.537	35.3081
81.9356	47.125	26.4224		30.9942	40.3565	26.4224
42.6147	32.5665	85.6204		75.5556	22.1772	85.6204
65.4907	23.5483	19.7439		42.7268		19.7439

## Sheet: Nighttime aSBN
nSyb-GS control	nSyb-GS>E75 RNAi	UAS control		Repo-GS control	Repo-GS>E75 RNAi	UAS control
6.33333	12.6667	4.33333		11.6667	8.66667	4.33333
11	16	7		5.33333	22	7
12.6667	9.66667	17		8.66667	10.3333	17
5	11.3333	10		1.33333	14.3333	10
6	10.3333	10		3.33333	11	10
7	13	2.66667		5	9.33333	2.66667
5	18	8.66667		4.66667	10.3333	8.66667
9.33333	13.6667	5.33333		2.66667	10.6667	5.33333
12	8.33333	5		15.6667	14.3333	5
6.33333	18.3333	7		1.33333	7.33333	7
3.66667	16.6667	6.33333		9	22.3333	6.33333
5	14	5.33333		1.66667	15	5.33333
9.66667	9.33333	4.66667			13.3333	4.66667
10.3333	13	2.66667			9.33333	2.66667
8	15	3.33333			11	3.33333
4.66667		3			11	3
6	13.3333	7		2.66667	14	7
2	16.3333	15.6667		15.6667	21.6667	15.6667
6.66667	15	27		2	19.3333	27
5.66667	17.3333	22		17.3333	18	22
9.33333	12	26.3333		5.33333	20	26.3333
12.3333	12.3333	19.6667		10.3333	18.6667	19.6667
5.33333	13.3333	25		8	24.3333	25
4	13.6667	18		10.3333	15.3333	18
13	8	13		13.3333	20.3333	13
8.33333	10.3333	18.6667		11.6667	15	18.6667
5.33333	12	14.3333		9.66667	18.3333	14.3333
10.6667	13.6667	18.3333		10.3333	16.6667	18.3333
2.66667	17.6667	19.3333		3.66667	20.6667	19.3333
2.33333	20.3333	6		6.33333	20.6667	6
	19.3333	13		4.33333	18	13
	9.33333	17.3333		9.66667	15.6667	17.3333
16	12	8.66667		9.66667	13.6667	8.66667
10.6667	9.33333	8.66667		7	13.6667	8.66667
8.66667	14	4		12	19.3333	4
9.33333	11.6667	18.6667		9.33333	16.3333	18.6667
2.33333	5.66667	16.3333		7	17	16.3333
15.3333	18.6667	18.3333		9	12.6667	18.3333
14.6667	9.66667	11.3333		3.66667	19.6667	11.3333
15.6667	13	20.6667		12.6667	18.6667	20.6667
9.66667	16	20.6667		12.6667	13.3333	20.6667
11	14.6667	10		11.6667	14.3333	10
10.3333	13.3333	24.3333		5	15.3333	24.3333
17.3333	7.33333	18.3333		7.66667	14	18.3333
10	10	14.3333		9.33333	8.33333	14.3333
7.66667	12.3333	18.3333		16.3333	12.3333	18.3333
13	15	10.3333		7.66667	15.3333	10.3333
8.66667	16	23		13.6667		23
