# Supplementary material for: Ecdysone acts through cortex glia to regulate sleep in Drosophila
Source: eLife. 2023 Jan 31;12:e81723. doi: 10.7554/eLife.81723 (PMC9928426; doi:10.7554/eLife.81723)
Supplement: Figure 2—source data 3. [file elife-81723-fig2-data3.xlsx]

## Sheet: Hr51
nSYb	nSyb-GS>Hr51 RNAi	Hr51 RNAi	Repo-GS	Repo-GS>Hr51 RNAi
790.5	699	471.5	986	341.75
924.5	611.5	989.75	719	403.75
786.5	698	825.75	296	572.5
677.75	855.75	608.75	257	525
790.25	536.5	749.75	543	298.5
888.25	300.25	778.5	619	815.25
689	813.25	796.5	873	556.75
858.25	652.25	827.25	397	823.75
586	826	619	781	692
495	756.75	797.25	842	494.25
761	984.5	694.25	799	542.25
	616.75	970.5	601	380.25
	740	828.5	620	670.75
	532.5	1052	484	433.75
	623.5	1094	826	484.5
	476.5	1171.25	513	440.25
599.333	704.667	785	933	629.667
600.667	715.333	726	584	736.333
437.333	370	847.333	707	482.333
572.333	675.333	947	682	452
708.333	793.667	973.667	720	697
177.667	654.333	649.667	631.667	643.333
675.333	599.667	734	953	625
700.667	529.333	866.667	601	527.667
982	806.667	761	645.667	561
640	808	623.667	744	794.333
465.333		757.667	819.333	533.333
663		897.667	603	620
761.667		831.333	857	634.667
704		922.667	617.667	569.333
640		912.333	482.667	442.333
807.667		883.333	377	442.333

## Sheet: G
Vehicle control	RU486
507.5	422
709.75	513.25
644	209.25
837.5	414
576.25	360.75
467.25	322.75
681.5	382.75
513	517.75
538.5
724	570
673	309.5
441.5	427
474	677.5
693	373.5
	606.5
	348
	366
	374.5
	276
	745
	340
	321
	581.5
	853
	424
503	340
453.5	498
619	352.5
496.5	489.5
679	360.5
583	430.5
721	225.5
810.5	507
730	247
471	382
587	456
945	377
623.5	669.5
665	598.5
613.5	256.5
510	502

## Sheet: H
Vehicle control	RU486
774	537
758	585.5
649	330
476	672.5
776	584
857	380
832	440.5
617	467.5
871	339.5
868	354
618	638
793	409.5
1202	365.5
556	209.5
527	459
675
401.5	242.5
487.5	262
149.5	696
511.5	221.5
301	637
401.5	360
681.5	766.5
443.5	544
394.5	249.5
623.5	270
409.5	145.5
718	292
	527
