# Supplementary material for: Ecdysone acts through cortex glia to regulate sleep in Drosophila
Source: eLife. 2023 Jan 31;12:e81723. doi: 10.7554/eLife.81723 (PMC9928426; doi:10.7554/eLife.81723)
Supplement: Figure 2—source data 4. [file elife-81723-fig2-data4.xlsx]

## Sheet: RepoTubGal80ts EcR RNAi
Gal4 control	Gal4>UAS	UAS control		Gal4 control	Gal4>UAS	UAS control		Gal4 control	Gal4>UAS	UAS control		Gal4 control	Gal4>UAS	UAS control
668	721			319	66			475	270			1157	998
993	707			629	291			954	671			1220	1271
842	676			357	73			626	123			1283	1209
797	747			367	214			541	245			1277	1018
647	1033			487	138			593	320			828	1196
826	806			831	162			814	369			1170	1227
668	853			461	155			666	339			663	1109
745	782			435	203			632	526			1262	1308
901	570			338	31			409	112			1168	1006
708	751			415	103			646	689			888	925
878	590			532	113			776	383			1312	1241
819	657			969	183			1205	530			1377	1105
837	652			590	137			825	381			1388	1116
					65				225				854
					209				397				1108
728	530	801		684	265	672		707	272	929		766	1046	1101
725	699	678		574	227	372		834	475	575		870	1132	1082
577	699	762		543	239	675		896	412	650		1010	1013	1080
664	915	652		448	592	666		435	712	829		1125	1212	1137
790	631	678		455	376	628		535	467	693		1323	1093	1042
746	641	822		686	447	346		968	573	694		1367	1239	1051
638	889	871		321	451	814		581	662	811		1086	1243	1054
658	687	562		792	255	539		934	398	672		1147	1137	1123
789	507	690		642	315	511		903	506	708		1126	1168	1074
786	698	853		932	623	711		1077	916	804		1145	1067	1093
937	376	798		914	61	1032		448	185	1073		1178	936	1131
815	599	662		830	211	439		799	299	520		1040	971	1066
687	644	567		749	445	691		918	381	651		947	1143	1079
858	855	688		748	571	902		998	581	814		1040	1114	1130
595	827	925		694	322	730		937	416	839		1099	1053	1283
877		822		978		862		942		985		1125		870
960		747		946		507		879		670		1230		1146
		818				436				455				1175
		959				549				735				1070
		561				498				497				1135
		826				771				655				1016
		828				609				921				1185
		619				580				846				1066
		654				370				647				1027
		818				749				702				1046
		727				664				797				1004
		1040				707				868				1112
		638				838				773				1025
1098	485	926		513	317	795		814	445	661		1287	1002	1118
723	660	1168		670	281	483		728	459	718		1094	982	1334
932	746	938		490	531	551		573	572	714		1065	1148	1258
891	899	797		371	417	504		552	619	679		1231	1005	1137
1054	773	818		745	374	507		978	366	696		1349	1093	1171
1061	900	800		832	498	529		953	299	578		1319	1201	1168
1314	669	843		482	321	620		589	152	793		1391	989	1220
877	755	678		267	328	768		596	493	793		1258	1113	1174
	889	915			402	420			530	661			933	1237
	762	947			355	514			292	755			660	1141
	877	961			214	780			457	742			1132	1178
		772				472				699				1159
		644				550				603				1089
		808				718				800				1205
		882				887				871				1287
		880				590				697				1234
		910				706				922				1194
		987				697				798				1316
		733				520				653				1249
		936				578				821				1104
		777				627				712				1139
		1014				1109				1203				1309
		775				446				545				1238
		904				724				702				1163
		842				822				998				1290
		657				541				627				1207
		751				441				502				985
		704				428				562				1210
		905				731				909				1247
		767				989				1057				1267
		816				579				818				1099

## Sheet: 9328
Repo-GS>Wcs	EcR_B1 RNAi 9328	Wcs>EcR 9328
731	355	881
1104	731	947
870	380	1021
586	405	380
539	212	1127
574	470	942
1016	320	979
891	1015	1018
747	29
897	464
673	847
497	713
818	520
859	255
594
789
855	575	1089
568	992	508
699	474	869
771	439	512
547	757	1085
488	782	1078
803	746	1144
738	239	1091
642	961
813	860
774	798
551	497
834	860
612	553
748	863
819	633

## Sheet: 9329
Repo-GS>Wcs	EcR_B1 RNAi 9329	Wcs>EcR 9329
613	533.667	844
777	638.333	968
732	503.333	701
505	507	696
917	577	535
612	696.667	840
682	897	894
737	507	614
745	671.667	850
758	731.333	972
723	510.333	1007
748	751.667	709
630	572.667	994
850	390.667	543
637	523	776
610	296.333	896
731	355	531
1104	727	478
870	601	652
586	224	574
539	863	754
574	359	436
1016	730	684
891	311	815
747	789	830
897	29	994
673	356	943
497	918	895
818	493	508
859		796
594		640
789		785

## Sheet: 9452
Repo-GS>Wcs	EcR_B1 RNAi 9452	Wcs>EcR 9452
696	624	898
1104	413	856
816	520	721
618	531	812
694	507	738
591	237	896
959	95	639
809	696	706
900	345	550
916	344	806
900	535	924
510		745
695		926
836		937
599		522
912		1152
855	371	726
568	401	767
699	492	882
771	446	834
547	402	963
488	609	1045
803	105	874
738	702	745
642	257	840
813	423	712
774	490	820
551		888
834		1007
612		957
748		1099
819		1112
