# Supplementary material for: Ecdysone acts through cortex glia to regulate sleep in Drosophila
Source: eLife. 2023 Jan 31;12:e81723. doi: 10.7554/eLife.81723 (PMC9928426; doi:10.7554/eLife.81723)
Supplement: Figure 2—source data 5. [file elife-81723-fig2-data5.xlsx]

## Sheet: nSyb-GS>EcR RNAi
nSyb-GS>Wcs	nSy-GS>EcR RNAi #1	Wcs>EcR RNAi #1		nSyb-GS>Wcs	nSy-GS>EcR RNAi #1	Wcs>EcR RNAi #1		nSyb-GS>Wcs	nSy-GS>EcR RNAi #1	Wcs>EcR RNAi #1
763	491.333	864.333		231.667	15.3333	264		539.667	476	600.667
685	833.667	970		162	429.667	362		511.667	404	608.667
501	590	880.333		81.6667	120.667	265		503.333	469.333	615.667
787	1220.5	923		171.667	590.5	315		589.667	630	608.333
788	118.667	903.333		130	23.3333	312.667		631.333	95.3333	591
742	845	893.667		196.333	415.333	301		555	429.667	593
620	529.667	929		99.6667	158.333	322		464.667	371.333	607.333
513	1012.67	923.667		45.3333	496.667	323.667		477	516	600.333
777	645.667	702		158.333	265	177.667		605.667	380.667	524.667
727	493.667	822.667		57.3333	39	232.333		608.667	454.667	590.667
970		931		297		310.667		678.333		621
670		927.667		82		288.667		608.333		639.667
634	460	692		242	104.667	179.333		371	355.333	513
625	1055.5	869.333		110.333	419.5	228.667		599.667	636	641
783	662.333	990.333		241.667	134.333	345.333		572.667	528	645.333
768		853.667		153.667		242.333		628		611.667
685	496.667	899		172	136	311		513	360.667	620.333
816	1066.67	715		189.333	471	238.333		626.667	595.667	504.333
694	739.667	972		158.667	224	315.667		535.333	515.667	656.333
706.667	655.667	1016		103.667	233	370		603	422.667	615
659.667	772.667	1078		80.6667	217	427.667		579	555.667	646.667
951.667	662	742		369.667	276	279		582	386	480
593	729.333	680		107.667	176.667	235.667		485.333	552.667	491.333
854.667	784	905		243.333	310.667	332.667		611.333	473.333	566.667
889	880	796		329	300.333	206.333		560	579.667	546.333
1004.67	790.333	1036		424.667	242.333	319		580	548	646
893	583.333	756		320	92	326		573	491.333	453.667
611.333		986		105		371		506.333		538.667
802.667	758.667	1003		140.333	311.667	364.333		662.333	447	589.667
850.333	618	910		241	106.667	366.667		609.333	511.333	523.667
	460.333	896			146.667	262			313.667	595
	367.667	852			63.6667	244.667			304	590.333
710	897	729.667		198.333	388.333	266		498.667	515.667	463.667
602	760	700.333		222.333	253	257.333		475	416	443
993	723	848.333		324	247.667	291.667		553.667	403.667	556.667
702	665	989		218	215	402.333		554.333	372	586.667
901	698	901		261	236.333	303		640.333	406.667	598
846	640			372	282.333			441.667	381.667
446	881	860		133.333	365	323.333		373.667	506.333	536.667
522	618	940.667		162.333	340.667	387.667		385	454.333	553
862	932	744		310.333	318	263		532	561.667	481
790	811	921.333		232.333	277	341		545	447.333	580.333
738	743	884.333		126.667	268.333	379		541.333	521.667	505.333
860	638	1050		344	224	460.333		482.333	393.333	589.667
634	560	661.667		180	202	257.667		423.333	373.333	404
587	816	860.333		139	328.667	377.333		512	402.667	483
773	714	754		244	323	337		528.667	403	417
580		847		204.333		326		464.667		521

## Sheet: Repo-GS>EcR RNAi
Repo-GS>Wcs	Repo-GS>EcR RNAi #1	Wcs>EcR RNAi #1		Repo-GS>Wcs	Repo-GS>EcR RNAi #1	Wcs>EcR RNAi #1		Repo-GS>Wcs	Repo-GS>EcR RNAi #1	Wcs>EcR RNAi #1
691.333	362.333	992		178.667	99	379		513	376.5	613
524.333	578.5	987.667		75.3333	202	331.667		449.333	395.5	656
865.667	405.667	810		312.667	319.5	125		553.667	364	685
732.333	715	983		193.333	323.5	333		539.333	335.667	650
938.667	826.667	1031		362	26.6667	388.333		577	258.333	642.667
829.667	426.333	1015.67		243	147.333	386.667		587.667	525	629
736	687.5	947		179.667	301.667	300.333		557	278.667	646.667
912.667	830	769		313.333	147.667	119		600	474	650
844.667	745.333	984.667		245.333	356	337.667		600.333	433.333	647
633.333	308.667	1027		127	312	345.667		507	187	681.333
748	813	975		178	121.667	329		571	645.333	646
841.333	553.333	992		274.333	167.667	358		567.333	358.333	634
906.333	418.667	909.667		375	195	234.333		531.667	275	675.333
953	246	1004		392.333	143.667	329		561	345.667	675
849.333	475.333	1013.33		330	129.667	362.667		519.667	307.333	650.667
985	381.333	951		379.333	74	386.667		606	290	564.333
992.667	404.667	886.667		371.333	114.667	216.333		621.667	194.333	670.333
776.333	238	950.333		208	43.6667	329.333		569	410.667	621
626.667	854	889.333		135.333	443.333	278.667		491.667	474	610.667
836.667	722	1064.67		297.667	248	392		539.333	468	672.667
	670.667	971			202.667	354				617
		933				272.667				660.333
		1017				383.5				633.5
		868.667				200.333				668.333
		964.333				325.333				639
		882.667				230				652.667
		897.333				226				671.333
		1081.67				414				667.667
		1041.33				393				648.333
		940				319				621
		1036.67				388.333				648.333
		1081.67				439				642.667
673	634.667	864.333		145	140.333	264		528.333	494.667	600.667
853.667	619.333	970		253	18.3333	362		601	601.333	608.667
935.333	259	880.333		314	23.3333	265		621.667	236	615.667
934		923		294		315		640.667		608.333
1017	257	903.333		406	103	312.667		611.667	154.667	591
838.667	375.333	893.667		282.667	54.3333	301		556.333	321.333	593
892.667		929		276.333		322		617		607.333
900	149.333	923.667		283.333	22.3333	323.667		617.333	127.333	600.333
947.333	714.667	702		382.333	211	177.667		566	504	524.667
1003.33	424	822.667		359.333	38.6667	232.333		645	385.667	590.667
644.333	33	931		44.3333	1.33333	310.667		601	32	621
938.333	316	927.667		315.667	108.333	288.667		623.333	208	639.667
	353.333	692			36.3333	179.333			317.333	513
		869.333				228.667				641
		990.333				345.333				645.333
		853.667				242.333				611.667
1174.67	283	931.333		507.667	18.6667	311		668	274.667	620.333
567	384	742.667		152.333	49.6667	238.333		415	335	504.333
1020	219	972		345.333	9.33333	315.667		675.667	229.667	656.333
697.667		985		179.333		370		519.333		615
899.667	573	1074.33		306.333	83	427.667		593.667	419.333	646.667
717	570	759		96.6667	62	279		621	433	480
653.333	456	727		40.6667	77.3333	235.667		613	454	491.333
689.667	477	899.333		138.667	76	332.667		552	394.667	566.667
663.667	559	752.667		194.333	64	206.333		470	439	546.333
1034	742	965		467.333	196	319		567.667	483.667	646
659	305	779.667		154.333	55.6667	326		505.333	313.333	453.667
783.667	421	909.667		271.333	62	371		513	399	538.667
917.667	142	954		262.333	11.6667	364.333		656	232	589.667
846.667	402	890.333		198	22	366.667		649.667	334	523.667
1037.67	536	857		419.333	100	262		618.667	395	595
1010.33	391	835		407	15.6667	244.667		604.333	306	590.333

## Sheet: nSyb-GS>EcI RNAi
Total Sleep				Daytime Sleep				Nighttime Sleep
nSyb-GS Control	nSyb-GS>EcI RNAi	UAS-EcI RNAi Control		nSyb-GS Control	nSyb-GS>EcI RNAi	UAS-EcI RNAi Control		nSyb-GS Control	nSyb-GS>EcI RNAi	UAS-EcI RNAi Control
669.333	324.667	907		170	66	400		499.333	258.667	507
756.333	510.333	897.667		303.333	84.6667	274.333		453	425.667	623.333
782.667	503.333	889		233	188.667	359.333		549.667	314.667	529.667
668	395	797		235.333	53.6667	350.333		432.667	341.333	446.667
781.667	167.333	722.667		320.333	3.33333	244.333		461.333	164	478.333
588.667	494.667	1023.67		129.667	91.3333	397.333		459	403.333	626.333
720	387.333	728.333		246.333	26	305.333		473.667	361.333	423
753	533	915.667		211	130	333.333		542	403	582.333
879.667	329.333	1030.33		323	34.3333	393		556.667	295	637.333
822.333	396	891		282	46.3333	325		540.333	349.667	566
942.333	414	779.333		424.667	46.6667	242		517.667	367.333	537.333
906.333	381.333	960.333		364.667	42.6667	353		541.667	338.667	607.333
879		802		399.667		232.333		479.333		569.667
800.333		888		312		320.333		488.333		567.667
861		751.667		238.333		394.333		622.667		357.333
772		904		335		344		437		560
758	546	827		252	116	374		506	430	453
543	730	826		204	236	356		339	494	470
547	666	734		104	242	380		443	424	354
914	667	1005		349	201	414		565	466	591
817	646	674		247	121	259		570	525	415
687	397	854		206	31	343		481	366	511
594	566	709		93	120	175		501	446	534
770	568	761		174	62	247		596	506	514
870	463	490		283	60	169		587	403	321
633	598	817		199	144	291		434	454	526
	851	917			236	396			615	521
	495	634			81	312			414	322
	438				121				317

## Sheet: Repo-GS>EcI RNAi
Total Sleep				Daytime Sleep				Nighttime Sleep
Repo-GS Control	Repo-GS>EcI RNAi	UAS-EcI RNAi Control		Repo-GS Control	Repo-GS>EcI RNAi	UAS-EcI RNAi Control		Repo-GS Control	Repo-GS>EcI RNAi	UAS-EcI RNAi Control
677.667	456.667	907		109	118	400		568.667	338.667	507
551	588	897.667		119	53.3333	274.333		432	534.667	623.333
456.333	858.667	889		56.3333	326.667	359.333		400	532	529.667
757.333	405	797		204.667	64.3333	350.333		552.667	340.667	446.667
592	199	722.667		79.6667	60	244.333		512.333	139	478.333
580	371	1023.67		94.6667	119.667	397.333		485.333	251.333	626.333
265.333	445.333	728.333		22.3333	153	305.333		243	292.333	423
509.333	387.333	915.667		78.6667	70.3333	333.333		430.667	317	582.333
996	357.333	1030.33		395	63.6667	393		601	293.667	637.333
529	220.667	891		112	28.6667	325		417	192	566
543	255	779.333		89.3333	95.6667	242		453.667	159.333	537.333
507.333	375.667	960.333		104.333	89.3333	353		403	286.333	607.333
495.667	627.667	802		57.6667	200.333	232.333		438	427.333	569.667
667	322.333	888		183.667	135.667	320.333		483.333	186.667	567.667
562.333	423	751.667		78	185.333	394.333		484.333	237.667	357.333
457	660	904		71.3333	164.667	344		385.667	495.333	560
487	723	827		102	220	374		385	503	321
608	423	826		79	8	356		529	415	322
725	172	734		144	27	380		581	145	354
748	635	1005		153	69	414		595	566	415
557	661	674		150	202	259		407	459	453
548	607	854		23	74	343		525	533	470
858	550	709		167	20	175		691	530	511
737	678	761		252	329	247		485	349	514
759	275	490		214	34	169		545	241	521
859	512	817		212	9	291		647	503	526
638	335	917		71	71	396		567	264	534
690	210	634		275	12	312		415	198	591
620				139				481
609				145				464

## Sheet: nSyb-GS>EcR OE
Total Sleep				Daytime Sleep				Nighttime Sleep
nSyb-GS Control	nSyb-GS>EcR-c OE	UAS-EcR RNA-c Control		nSyb-GS Control	nSyb-GS>EcR-c OE	UAS-EcR RNA-c Control		nSyb-GS Control	nSyb-GS>EcR-c OE	UAS-EcR RNA-c Control
762.667	890.333	1014.67		231.667	200.667	347.333		539.667	698.333	659.667
632	880.333	834		162	396.5	287		511.667	462	575.333
647	1027.67	722.667		81.6667	377	148		503.333	713.667	584.333
735.667	618.667	673.333		171.667	134.667	126.667		589.667	666.667	553.333
774.667	1132.33	814.333		130	544	255		631.333	589.5	549.667
807.333	922.333	838.333		196.333	387	191.667		555	574.667	601
569.667	833.333	814.333		99.6667	408.333	223		464.667	542.333	630.333
494.333	955.333	815.333		45.3333	343	192		477	609.5	580.667
702.333	914.667	740.667		158.333	315	187.333		605.667	625.333	561
679.333	1151	852.667		57.3333	536.667	319.667		608.667	629.333	543.667
960	845	854.667		297	245	285		678.333	625	571.333
697.333	1042.33	807.667		82	460.667	207.667		608.333	606	584.333
631.333	887	843.667		242	288.333	266.333		371	676.667	544.333
694.333	726			110.333	373.333			599.667	536
788.667	775			241.667	341.667			572.667	648
797.333	615			153.667	30.3333			628	585
685	712	946		172	242	378		513	470	568
816	656.667	759.667		189.333	118.667	248.333		626.667	538	511.333
694	610	704.333		158.667	187	222.333		535.333	423	482
706.667	853.667	832.667		103.667	256	273.333		603	597.667	559.333
659.667	1094.33	920.667		80.6667	412	340		579	682.333	580.667
951.667	806.333	763		369.667	258.667	210.333		582	547.667	552.667
593	784.333	999.667		107.667	249.667	359.667		485.333	534.667	640
854.667	956.667	952.667		243.333	373.333	395.333		611.333	583.333	557.333
889	1114.33	955.333		329	456.333	391.333		560	658	564
1004.67	866.667	749.667		424.667	361.667	264		580	505	485.667
893	951	825.667		320	320.333	315.667		573	630.667	510
611.333	904.667	876.333		105	244.333	362		506.333	660.333	514.333
802.667		922.667		140.333		339		662.333		583.667
850.333		814		241		263.667		609.333		550.333
		718.333				227.667				490.667
		893				353.667				539.333
697	828	895.333		198.333	242.333	322.333		498.667	595	573
697.333	694	842.667		222.333	398	396		475	503	446.667
877.667	597	998.333		324	181	457		553.667	537.667	541.333
772.333	946	860.333		218	326.667	316.667		554.333	648	543.667
901.333	941	863		261	380	333.667		640.333	556	529.333
813.667	1058	877.667		372	410	322.667		441.667	638	555
507	979	969.667		133.333	377	374.667		373.667	501	595
547.333		892.667		162.333		262.333		385		630.333
842.333		736.333		310.333		347		532		389.333
777.333				232.333				545
668				126.667				541.333
826.333				344				482.333
603.333				180				423.333
651				139				512
772.667				244				528.667
669				204.333				464.667

## Sheet: Repo-GS>EcR OE
Total Sleep				Daytime Sleep				Nighttime Sleep
Repo-GS Control	Repo-GS>EcR-c OE	UAS-EcR RNA-c Control		Repo-GS Control	Repo-GS>EcR-c OE	UAS-EcR RNA-c Control		Repo-GS Control	Repo-GS>EcR-c OE	UAS-EcR RNA-c Control
695	612.333	1014.67		145	275.333	347.333		528.333	399	659.667
902	929.667	834		253	246	287		601	542.333	575.333
785	671.333	722.667		314	113.667	148		621.667	508.667	584.333
978	613.333	673.333		294	97.3333	126.667		640.667	413.333	553.333
986	592.667	814.333		406	49.3333	255		611.667	431	549.667
890.333	794.333	838.333		282.667	117.333	191.667		556.333	521	601
920	934.667	814.333		276.333	246.667	223		617	627.333	630.333
984.667	893.667	815.333		283.333	232	192		617.333	544	580.667
859.667	772	740.667		382.333	191.333	187.333		566	441.333	561
1066	691	852.667		359.333	141	319.667		645	432.333	543.667
719	872.333	854.667		44.3333	270.667	285		601	491.333	571.333
983	662.667	807.667		315.667	63	207.667		623.333	510	584.333
	892	843.667			313.333	266.333			547	544.333
	855				299.333				476.333
	947.667				328.333				567
	1023.67				467				617
1175.67	453	946		507.667	222	378		668	231	568
567.333	795.333	759.667		152.333	322	248.333		415	473.333	511.333
1021	739.667	704.333		345.333	282.333	222.333		675.667	457.333	482
698.667	589.667	832.667		179.333	197.333	273.333		519.333	392.333	559.333
900	647.667	920.667		306.333	252.667	340		593.667	395	580.667
717.667	459	763		96.6667	127.333	210.333		621	331.667	552.667
653.667	451.667	999.667		40.6667	142	359.667		613	309.667	640
690.667	520.333	952.667		138.667	162.333	395.333		552	358	557.333
664.333	804.333	955.333		194.333	357.667	391.333		470	446.667	564
1035	531.333	749.667		467.333	262	264		567.667	269.333	485.667
659.667	605.667	825.667		154.333	170.333	315.667		505.333	435.333	510
784.333	651	876.333		271.333	167.667	362		513	483.333	514.333
918.333	466.333	922.667		262.333	77	339		656	389.333	583.667
847.667	626.667	814		198	188.333	263.667		649.667	438.333	550.333
1038	639	718.333		419.333	150.667	227.667		618.667	488.333	490.667
1011.33	572	893		407	131.667	353.667		604.333	440.333	539.333
735.333	875	922.333		169.333	320.667	257		566	554.333	665.333
823.667	1134.67	840		126	479.667	265.667		697.667	655	574.333
995.667	875	987.667		330.667	277.667	364.667		665	597.333	623
957.333	1026.33	927.667		286.667	473.667	304		670.667	552.667	623.667
951.333	848	1016.33		313.333	269.667	389.667		638	578.333	626.667
839.667	828	948.333		229	342.333	268		610.667	485.667	680.333
932.667	1045	911.333		239	446	317		693.667	599	594.333
973.333	1051.33	970.333		279.333	440	314.333		694	611.333	656
720.333	995.667	949		92.3333	413.667	394		628	582	555
1017	1044.67	810.667		338.333	462.667	193.333		678.667	582	617.333
887.333	966	975.333		214.333	338.667	370		673	627.333	605.333
967	1039.33	906.667		266.667	441	289		700.333	598.333	617.667
796	1066.33	873.667		118.333	435.667	249.667		677.667	630.667	624
920.667	720	919.333		326.667	160	272.333		594	560	647
906.667	653.667	907.333		232.667	64.3333	234.333		674	589.333	673
1048.67	1048	906.333		361.667	448	352.667		687	600	553.667
877.833	781.833	867.385		259.576	259.972	284.815		614.091	496.076	581.444
