# Supplementary material for: Ecdysone acts through cortex glia to regulate sleep in Drosophila
Source: eLife. 2023 Jan 31;12:e81723. doi: 10.7554/eLife.81723 (PMC9928426; doi:10.7554/eLife.81723)
Supplement: Figure 3—source data 1. [file elife-81723-fig3-data1.xlsx]

## Sheet: Fig3E
Fed	Fed-Ecdysone		Fed	Starved	Starved-Ecdysone		Fed	Starved	Fed	Starved
1.05451	1.15413		0.877891	0.648377	1.23479		0.635343	0.357565	0.870155	0.162646
0.944539	1.11712		1.2038	0.721822	0.150332		1.06383	0.067967	1.05923	1.35606
0.989724	1.19823		0.794119	0.919204	1.11659		1.20567	0.588061	1.17308	1.30726
0.751276	1.00769		0.81707	0.641492	1.05462		1.43912	0.620567	1.00637	0.359854
1.19115	1.12964		0.840021	1.5802	0.858383		0.951537	0.070922	0.662781	1.09786
0.99408	1.20041		1.21069	0.509521	0.253613		1.26182	0.567376	0.772567	0.939279
0.951616	1.12964		1.13724	0.135413	0.788381		0.892435	0.236407	1.39469	0.447276
0.552569	1.3229		1.13495	0.126233	1.56873				0.540797	0.138249
1.19388	1.23961		0.804447	0.425749	1.24052
1.16502	1.16938		0.961664	0.496898	0.97773		1.90012	0.694444
0.961415	1.15686		1.00068	1.11773	0.440667		1.07861	0.097518	1.57156	1.01654
1.06757	1.02239		0.905433	0.843464	0.247875		1.00177	0.478723	1.16698	1.09989
1.09098	1.16611		0.998386	0.704608	1.5802		0.700355	0.218676	0.69531	1.29303
0.919496	0.949983		1.36561	0.423453	0.959369		1.17908	0.065012	0.864055	0.215506
0.836747	1.13562		1.03052	0.158365	0.787233		0.070922	0.189125	1.07956	1.22594
1.05396	1.08499		1.5802	0.246728	1.5802		1.1052	0.023641	0.969775	0.060992
1.15522	1.03382		0.784938	1.33807	1.09019		0.514184	0.484634	1.17308	1.04093
1.00551	1.20857		1.04314	1.09823	1.40577
1.25539	0.996802		0.790676	0.951336	1.20954
0.984825	1.29949		0.825103	1.10167	1.19806
0.903164	1.18081		1.46889	0.830841	1.09708
0.921674	1.01205		0.988058	0.829693	1.09249
0.835658	1.13889		1.00871	0.48657	1.38512
1.01749	1.01531		0.632311	0.214596	1.10855
1.00388	1.1035		0.828546	1.01101	1.16019
1.06267	1.08663		0.922647	0.815922	1.15101
1.00878	1.13018		1.02822	0.37296	0.959369
0.818782	0.886288		0.865268		0.983468
1.17591	1.00606		1.03626		1.35184
1.10949	1.23688		0.962811		1.21069
1.05179	1.06975		1.27839		1.13724
0.971215			0.873301		1.08331
