# Supplementary material for: Ecdysone acts through cortex glia to regulate sleep in Drosophila
Source: eLife. 2023 Jan 31;12:e81723. doi: 10.7554/eLife.81723 (PMC9928426; doi:10.7554/eLife.81723)
Supplement: Figure 3—source data 2. [file elife-81723-fig3-data2.xlsx]

## Sheet: 20E Feeding
Repo-GS>EcR RNAi; E-	Repo-GS>EcR RNAi; E+	nSyb-GS>EcR RNAi; E-	nSyb-GS>EcR RNAi; E+	Wcs>EcR RNAi; E-	Wcs>EcR RNAi; E+	Repo-GS>Wcs; E-	Repo-GS>Wcs; E+	nSyb-GS>Wcs; E-	nSyb-GS>Wcs; E+
473.5	640	677	798	1076.5	893			788	742
765	688.5	448.5	937	841	786			1033.5	939
502.5	764	741.5	1149	968	1115			691	619
721.5	544	768.5	508	868	1066			580.5	918
787	415.5	837	502	989.5	926			558.5	1021
689.5	364.5	493.5	928	941	843			775	592
445	634.5	506	828	853	1157			834.5	553
289.5	489	601	827	1152	913			901.5	1013
539.5	547	733	621	953.5	771			554.5	894
408	418.5	828.5	640	924.5	943			285.5	740
873	406.5	714	750	796.5	1111			814.5	702
325	649	669.5	386	920.5	1016			537.5	593
587.5	487.5	478.5	583					784	1049
1000.5	718.5	718.5	496					583	711
447	260.5	483	562					886.5	723
510.5	769.5	684.5	936						811
278.667	346.333			932.333	1046	456	279
127.333	172.667			1061.33	1030	401.667	479.333
413.667	266			908	988	537.333	610.667
214.667	194			1031.67	987	712.333	534.333
105.333	182.333			993.333	1144	503.667
355	566.667			1041	1040	416.667	491.333
160.667	413.333			1043.33	921	762.667	390.667
364	214.333			795.667	900	686.667	374
96.3333	633			929.333	960	572.667	606.667
106.667	350.333			870.333	903	661.333	569
251.667	172.667			1047.33	864	485	499.667
347.333	289.667			1115.67	1163	305	501.667
531	53.3333			1083	893	412.667	417.667
272.667	318.333			1081.33	1052	226	518.333
	866.333			1079			540.333
				1091			575.667
503	784.333	407	393.333	842.333	914	868.333	868	749	1059.67
566	576.333	469	794.667	940.333	1140	655.333	896.333	960	1014.67
711		470	405.667	1015.67	944.667	688	758	741	1130.67
460	697.667	357	902	616	1163.33	650.333	892.333	655	988
678	1124	484	600	991.667	1103.33	641.667	793.667		1077.33
252	499.333	756	679.333	837.667	973.667	716.333	835.667	406	814.667
533	700.333	404	921.667	795.667	1023	603.333	575	1024	1087.33
484	589.667	313	589.667	900.333	1128.67	794.667	792.333	559	931
604		470	700.333	827	1009.67	653.333	1124	789	957
345	921.667	281	499.333	1012	1037.33	833.333	739	765	876
1159	679.333	254	697.667	932.333	1060.67	704.667	790	743	1077.67
522	600	730	576.333	784.333	906.667	690.667	676.667	803	751.333
730	902	543	784.333	795.333	1048	722	733.667	493	846.667
749	405.667	279		781	1091	836.333	651.5	947	933
509	794.667	340		961	1046.33		735.333	916	973.667
538	393.333	375		957	985.333		743	930	735.333

## Sheet: Heatshock
Repo-GS>EcR RNAi; HS-	Repo-GS>EcR RNAi; HS+	nSyb-GS>EcR RNAi; HS-	nSyb-GS>EcR RNAi; HS+	Wcs>EcR RNAi; HS-	Wcs>EcR RNAi; HS+	Repo-GS>Wcs; HS-	Repo-GS>Wcs; HS+	nSyb-GS>Wcs; HS-	nSyb-GS>Wcs; HS+
131	191	190	209	178	228	156	237	173	192
119	114	179	224	153	215	137	219	162	139
117	172	170	160	180	214	117	93	194	239
25	119	195	239	169	237	182	197	191	212
136	155	156	213	187	214	163	212	171	238
138	166	146	190	190	202	166	239	125	150
30	229	159	223	173	237	148	212	158	231
137	208	169	118	179	237	140	175	239	238
108	176	216	238	187	226	148	172	170	239
150	157	173	217	203	220	157	125	191	218
65	83	204	226	182	212	183	238	142	150
113	165	218	234	180	239	181	165	198	238
167	98	162	175	200	234	178	236	126	200
126	155	148	205	143	224	160	231	186	206
84	177	60	212	177	186	168	101	239	190
118	209	158	213	169	202		176	239	239
