# Supplementary material for: Ecdysone acts through cortex glia to regulate sleep in Drosophila
Source: eLife. 2023 Jan 31;12:e81723. doi: 10.7554/eLife.81723 (PMC9928426; doi:10.7554/eLife.81723)
Supplement: Figure 3—source data 3. [file elife-81723-fig3-data3.xlsx]

## Sheet: A
Brain			Pheriphery
zt2	zt14		zt2	zt14
6.865	5.53		32.275	59.95
3.1235	8.255		47.4	61.3
7.91	5.97		22.11	77.21
1.194	7.615
	3.98

## Sheet: B
	E75A			E75B
Head
zt0	0.701087	0.330106	0.531202	0.640084	0.675175	0.382801
zt6	1.429	0.759611	0.720797	1.34506	1.33268	1.63845
zt12	1.09227	1.39313	1.53758	1.77686	1.50212	1.36636
zt18	0.914465		1.69937	0.654138	0.739523	1.16689
Periphery
zt0	1.04054	0.997923	0.81828	1.16339	0.488806	0.621431
zt6	0.594741	3.42238	0.636692	1.77522	1.96428	0.855398
zt12	0.882907	1.16851	0.586553	2.10526	0.717475	0.739694
zt18	0.122711	0.250868	3.2769	0.229781	1.45062	2.54206

## Sheet: C
	E75A			E75B
zt6	1.4577	2.12608	1.41699	21.3938	16.7985	12.8143
zt18	5.46498	3.24914	3.01851	50.7736	55.9806	49.0204

## Sheet: D
Control E74A	Starvation E74A	Control E75A	Starvation E75A	Control E75B	Starvation E75B	Control EcI	Starvation EcI	Control EcR common	Starvation EcR common	Control EcR_1	Starvation EcR_1	Control EcR_2	Starvation EcR_2
1	0.731347	1	1.35715	1	0.487768	1	1.55388	1	0.809829	0.913948	0.662617	0.851778	0.793196
0.796257	0.904645	1.3295	1.13933	1.36761	1.33694	2.15766	2.22366	1.00258	0.979618	0.841229	0.666344	0.870847	0.776032
0.839332	0.979847	2.14225	1.1012	1.24204	1.71264	1.8313	2.16019	0.669478	0.935406	0.421092	1.02975	0.543371	1.11761
0.757781	0.784342	1.34501	2.89699	0.846609	1.39141	2.34006	1.76226	0.690801	0.789713	0.533669	0.964132	0.64393	0.903448
