# Supplementary material for: Ecdysone acts through cortex glia to regulate sleep in Drosophila
Source: eLife. 2023 Jan 31;12:e81723. doi: 10.7554/eLife.81723 (PMC9928426; doi:10.7554/eLife.81723)
Supplement: Figure 4—source data 1. [file elife-81723-fig4-data1.xlsx]

## Sheet: Sheet1
nSyb-GS RU-	nSyb-GS RU+	Repo-GS RU-	Repo-GS RU+
0	4	5	1
1	5	1	0
1	1	5	0
0	4	1	0
5	5	5	0
1	5	5	0
1	2	5	0
4	0	0	3
1	2	3	2
0	0	2	1
		4
