# Supplementary material for: Ecdysone acts through cortex glia to regulate sleep in Drosophila
Source: eLife. 2023 Jan 31;12:e81723. doi: 10.7554/eLife.81723 (PMC9928426; doi:10.7554/eLife.81723)
Supplement: Figure 5—source data 1. [file elife-81723-fig5-data1.xlsx]

## Sheet: Fig5A
GMR77A03	Exp	RNAi		Eaat1	Exp	RNAi		GMR56F03	Exp	RNAi
861	319.667	751.333		741	483.5	569.5		708	454.5	569.5
735	608.333	993		716	661	465.5		792	549	465.5
863	574	898.667		1034	646.5	621.5		818.5	642	621.5
698	397	813.333		710	931.5	580		624	587	580
575	683	796.667		914	695.5	577		876	542.5	577
761	742.667	931		853	778.5	645.5		737	423.5	645.5
694	640.333	747.333		552	568	618		566	684	618
743	588	785.667		752	763	535		776	500	535
635	744	799.333		697	723.5	552		730.5	493.5	552
512	600	980.333		952	745.5	682		425	519	682
488	393.333	831.667		947	611	529		368.5	394.5	529
929	767.667	735.333		670	831.5	452		625	493.5	452
917	573.667	736.333		893	657	679.5		971	787.5	679.5
742	657.667	581		907	534	549.5		774	391	549.5
592	808.667	827.333		949	727	505.5		932.5	665	505.5
553	527	1013.33		665	583	580		757.5	571	580
	514
	539.667
	732
	269

## Sheet: Fig5B
9-137-Gal4 control	Exp	OE control		Moody	Exp	OE		GMR85601	Exp	OE		MZ0709	Exp	OE		GMR77A03	Exp	OE		Eaat1	Exp	OE
911	1273	1034		674	781	1034		636	960	1034		770	797	1034		861	1010.5	1034		717	1092	1034
748.5	1073.5	980		769	910.5	980		728	654	980		671	850.5	980		735	807.5	980		1035	1041	980
725.5	1308.5	735.5		366	961	735.5		640	744	735.5		547	942	735.5		863	991	735.5		711	989	735.5
627	982	959.5		703	884.5	959.5		831	975.5	959.5		389	795.5	959.5		698	800.5	959.5		915	869	959.5
814	1164	749.5		693	719.5	749.5		578	708	749.5		322	749.5	749.5		575	910.5	749.5		854	1068	749.5
973.5	1181.5	992		888	853	992		613	833	992		692	643	992		761	740.5	992		552	1078.5	992
849.5	1142	957.5		594	936	957.5		656	783	957.5		725	804.5	957.5		694		957.5		753	1060	957.5
772	1092	933		374	929	933		628	441.5	933		531	938	933		743		933		698	919	933
687.5	1135	733			809	733		568	829.5	733		522	1015.5	733		635		733		953	1008.5	733
764	955.5	881			860.5	881		550	757	881		625	1019.5	881		512		881		948	1119.5	881
700.5	1276.5	1004.5			872	1004.5			849	1004.5		336	821.5	1004.5		488		1004.5		671	969	1004.5
926	1165.5	808			786.5	808			898.5	808		647	816.5	808		929		808		894	1053	808
950	1146.5	718			866	718			840.5	718		426	717.5	718		917		718		908	909.5	718
879.5	1161	959.5			1043.5	959.5			872.5	959.5		633	772	959.5		742		959.5		950	855.5	959.5
745.5	1113	947.5			969.5	947.5			930.5	947.5		603	783.5	947.5		592		947.5		666	909	947.5
866.5	1230.5	898.5			860	898.5			694	898.5			975	898.5		553		898.5			956	898.5
													878
													821.5
													807.5
													764
													825.5
													484.5
													1004.5
													820

## Sheet: Fig5G
Gal4 control	Gal4>UAS	UAS control		Gal4 control	Gal4>UAS	UAS control		Gal4 control	Gal4>UAS	UAS control		Gal4 control	Gal4>UAS	UAS control
635	951	1081		623	499	714		806	274	922		853	947	1269
778	786	768		660	516	368		714	399	610		1068	858	1301
885	549	965		1061	412	1107		1212	426	712		1152	870	1172
1014	770	950		1073	728	627		1136	774	1081		1176	1056	1277
794	928	1182		796	582	920		847	659	722		1034	806	1244
745	533	938		741	337	706		835	441	686		1139	1002	1249
849	772	839		687	703	430		852	726	1028		1071	984	1274
998	834	1155		945	660	983		1076	409	855		1096	1174	1184
899	711	1143		1056	440	808		1228	557	919			741	1237
	802	1056			281	1092			333	852			975	1336
	964	966			585	563			482	745			938	1194
	954	963			834	571			873	407			1028	1091
	693	864			377	1340			736	997			1261	1308
	666	518			583	273			680	853			948	1107
	644	796			675	933			571				871
		750				520
693	674	958		548	523	414		545	539	420		1287	905	1196
714	643	619		500	418	308		737	479	577		1130	997	1276
661	593	773		648	206	396		958	420	571		1241	1004	1134
926	510	869		663	211	281		713	660	724		1290	1215	1276
890	831	759		497	234	554		700	346	727		1171	1164	1156
947	836	833		786	988	514		824	1150	868		1373	1222	1357
806	777	1075		519	549	398		649	713	759		1314	1088	1174
877	749	905		544	586	483		802	648	665		1355	1114	996
1300	731	877		709	361	648		862	557	837		1240	980	1204
969	781	1013		599	415	921		781	468	890		1266	1147	1162
897	759	1167		776	384	729		849	525	843			1040	903
1044		971		607		358		662		721				1244
839		991		1163		882		1313		700				1178
929		998		787		815		1066		778				1184
825		868				691				831				985
		907
921	575	924		768	254	623		465	212	727		1097	1035	1071
990	735	852		846	383	634		796	288	725		946	711	1053
815	830	872		620	317	685		941	455	693		812	889	1097
882	903	900		691	219	267		650	218	470		1109	689	909
921	733	989		445	302	516		961	440	836		945	869	1096
909	789	913		664	362	996		624	674	1061		1133	854	1000
782	638	937		388	295	561		723	286	951		915	759	874
797	926	954		703	615	523		527	690	715		874	799	1073
925	715	642		263	350	252		756	343	574		988	666	856
795	792	910		494	379	634		533	327	730		926	809	920
846	1004			453	876			699	751			749	1007
948	827			473	920			435	1016			992	1120
649	777			234	444			547	368			706	824
701	837			278	377			363	315			699	798
1007				635				529				1047
850								844				1023
								746

## Sheet: Fig5H
Gal4 control	Gal4>UAS	UAS control		Gal4 control	Gal4>UAS	UAS control		Gal4 control	Gal4>UAS	UAS control		Gal4 control	Gal4>UAS	UAS control
929	627	924		931	303	623		921	412	727		1135	784	1071
801	689	852		1398	580	634		686	762	725		904	1055	1053
601	733	872		723	318	685		920	791	693		836	868	1097
610	590	900		789	393	267		938	585	470		937	790	909
869	627	989		1009	558	516			643	836			764	1096
	463	913			484	996			516	1061			822	1000
	766	937			407	561			637	951			771	874
	586	954			503	523			597	715			737	1073
	804	642			465	252			437	574			758	856
	748	910			534	634			583	730			854	920
	777				512				685				804
	620				225				465				798
	560				446				713				815
	815				650				772				940
	472				389				731				942
	735				334				469				712
814	803	935		435	843	848		753	1012	911		1098	1107	954
959	406	755		595	560	309		786	654	667		1069	728	919
681	619	980		484	706	832		716	815	1013		939	942	1049
826	812	952		699	597	958		805	790	964		1106	855	1184
691	606	933		520	478	886		469	781	878		1008	1028	840
875	866	866		506	661	569		877	854	1017		918	1043	1026
854	671	950		631	691	760		954	734	912		1038	881	1138
	853	859			767	551			945	666			937	1133
	703	596			578	292			777	518			907	1178
	467	832			650	655			882	841			1022	1095
	697	761			643	273			1015	705			1271	966
	993	649			1001	362			1099	649			1134	837
	679	632			538	316			917	521			966	939
	648	953			319	688			721	853			886	1149
	809				613				856				1005
	723				701				778				868
877	803	764		731	751	489		669	1050	669		793	1191	1174
779	721	678		515	525	177		582	731	397		1126	965	1079
883	785	738		575	557	220		992	667	282		1015	1077	995
965	848	869		497	672	421		854	909	484		1174	1013	884
835	871	772		392	946	172		674	946	402		1002	1030	893
957	561	970		922	583	700		948	793	678		1203	1036	1050
681	598	559		767	431	127		979	659	413		949	1143	1047
691	1051	570		613	1004	349		753	861	450		848	1142	983
920	673	907		747	237	557		842	560	621		1272	1343	1348
1025	647	836		832	427	551		1060	605	600		1248	1028	1236
923	691	724		639	457	219		725	638	313			1047	978
	654	869			896	628			513	841			888	1266
	987	824			625	460			615	608			1028	1148
		1002				735				1265			882	1387
		712				227				511				1145
		788				403				444				1176
741	790	1081		853	358	714		890	353	922		940	1037	1269
973	857	768		1111	726	368		1183	649	610		1211	998	1301
796	935	965		611	552	1107		769	709	712		993	1086	1172
907	942	950		799	520	627		1004	429	1081		1078	939	1277
1082	875	1182		968	368	920		1004	694	722		1172	739	1244
1045	954	938		994	507	706		1236	478	686		1301	1057	1249
1023	970	839		905	819	430		926	645	1028		1057	958	1274
1115	1232	1155		773	1098	983		806	1014	855		953	1145	1184
795	684	1143		830	608	808		1010	515	919		1088	726	1237
1083	747	1056		775	767	1092		935	931	852		1345	1159	1336
689	1018	966		880	941	563		905	1134	745		1125	1154	1194
866	1048	963		678	858	571		919	712	407		1045	957	1091
855	680	864		858	1065	1340		980	1106	997		1167	1042	1308
596	1063	518		602	870	273		828	1019	853		1101	1203	1107
1022	1046	796		888	739	933		1160	680			1238	1052
1192		750		907		520		930				1225
915	789	958		202	201	414		561	495	420		978	1327	1196
827	877	619		256	147	308		749	252	577		1291	1147	1276
1028	750	773		1071	175	396		487	434	571		1134	1293	1134
582	724	869		195	295	281		552	362	724		1122	1213	1276
680	735	759		78	247	554		848	391	727		1052	1247	1156
849	631	833		580	399	514		752	397	868		1037	1127	1357
806	505	1075		346	395	398		725	492	759		1255	1114	1174
748	605	905		217	400	483		627	958	665		1357	1372	996
668	830	877		254	371	648			632	837			1375	1204
	747	1013			517	921			490	890			1267	1162
	710	1167			184	729			797	843			1294	903
	820	971			200	358			649	721			1039	1244
	764	991			357	882			524	700			1148	1178
	758	998			208	815			524	778			1272	1184
	854	868			282	691			719	831			1328	985
	665	907			335				377				1187
