# Supplementary material for: Ecdysone acts through cortex glia to regulate sleep in Drosophila
Source: eLife. 2023 Jan 31;12:e81723. doi: 10.7554/eLife.81723 (PMC9928426; doi:10.7554/eLife.81723)
Supplement: Figure 5—source data 2. [file elife-81723-fig5-data2.xlsx]

## Sheet: A
Gal4 control	Gal4>UAS	UAS control		Gal4 control	Gal4>UAS	UAS control		Gal4 control	Gal4>UAS	UAS control		Gal4 control	Gal4>UAS	UAS control
635	951	1081		623	499	714		806	274	922		853	947	1269
778	786	768		660	516	368		714	399	610		1068	858	1301
885	549	965		1061	412	1107		1212	426	712		1152	870	1172
1014	770	950		1073	728	627		1136	774	1081		1176	1056	1277
794	928	1182		796	582	920		847	659	722		1034	806	1244
745	533	938		741	337	706		835	441	686		1139	1002	1249
849	772	839		687	703	430		852	726	1028		1071	984	1274
998	834	1155		945	660	983		1076	409	855		1096	1174	1184
899	711	1143		1056	440	808		1228	557	919			741	1237
	802	1056			281	1092			333	852			975	1336
	964	966			585	563			482	745			938	1194
	954	963			834	571			873	407			1028	1091
	693	864			377	1340			736	997			1261	1308
	666	518			583	273			680	853			948	1107
	644	796			675	933			571				871
		750				520
693	674	958		548	523	414		545	539	420		1287	905	1196
714	643	619		500	418	308		737	479	577		1130	997	1276
661	593	773		648	206	396		958	420	571		1241	1004	1134
926	510	869		663	211	281		713	660	724		1290	1215	1276
890	831	759		497	234	554		700	346	727		1171	1164	1156
947	836	833		786	988	514		824	1150	868		1373	1222	1357
806	777	1075		519	549	398		649	713	759		1314	1088	1174
877	749	905		544	586	483		802	648	665		1355	1114	996
1300	731	877		709	361	648		862	557	837		1240	980	1204
969	781	1013		599	415	921		781	468	890		1266	1147	1162
897	759	1167		776	384	729		849	525	843			1040	903
1044		971		607		358		662		721				1244
839		991		1163		882		1313		700				1178
929		998		787		815		1066		778				1184
825		868				691				831				985
		907
921	575	924		768	254	623		465	212	727		1097	1035	1071
990	735	852		846	383	634		796	288	725		946	711	1053
815	830	872		620	317	685		941	455	693		812	889	1097
882	903	900		691	219	267		650	218	470		1109	689	909
921	733	989		445	302	516		961	440	836		945	869	1096
909	789	913		664	362	996		624	674	1061		1133	854	1000
782	638	937		388	295	561		723	286	951		915	759	874
797	926	954		703	615	523		527	690	715		874	799	1073
925	715	642		263	350	252		756	343	574		988	666	856
795	792	910		494	379	634		533	327	730		926	809	920
846	1004			453	876			699	751			749	1007
948	827			473	920			435	1016			992	1120
649	777			234	444			547	368			706	824
701	837			278	377			363	315			699	798
1007				635				529				1047
850								844				1023
								746

## Sheet: B
Gal4 control	Gal4>UAS	UAS control		Gal4 control	Gal4>UAS	UAS control		Gal4 control	Gal4>UAS	UAS control		Gal4 control	Gal4>UAS	UAS control
635	1060	837		623	981	696		806	1094	961		853	1167	1063
778	816	863		660	710	651		714	937	994		1068	1225	784
885	803	881		1061	723	853		1212	751	1009		1152	1188	1024
1014	964	1036		1073	748	1009		1136	992	1139		1176	1193	1085
794	1100	1043		796	753	876		847	926	1148		1034	1194	1159
745	844	1040		741	979	829		835	1076	1014		1139	1047	995
849	1147	978		687	870	482		852	1029	977		1071	1262	1081
998	1060	907		945	1002	743		1076	1001	880		1096	1016	1018
899	922	1010		1056	749	896		1228	824	933			871	1038
	1189	822			775	866			853	1137			1306	922
	665	1087			799	976			718	873			1097	1119
	1088	831			924	1006			1021	1193			1300	1017
	1119	1091			1001	806			1147	1092			1274	936
	1068	1007			1045	845			1055	1217			1066	1155
	927	921			969	721			1047	1084			1242	1116
	913	1014			885	992			909	880			1268	659
693	995	719		548	899	354		545	871	504		1287	1243	1142
714	712	726		500	511	815		737	745	972		1130	1136	1280
661	923	683		648	786	538		958	878	684		1241	1213	1083
926	868	725		663	566	798		713	809	865		1290	1387	1161
890	813	877		497	815	564		700	974	807		1171	1099	1105
947	779	734		786	703	678		824	856	706		1373	983	1067
806	1081	769		519	739	667		649	907	727		1314	1262	1227
877	1336	780		544	798	491		802	1058	870		1355	1125	1130
1300	883	886		709	719	569		862	954	819		1240	1169	1055
969	1101	789		599		559		781		674		1266		1178
897		811		776		522		849		740				1219
1044		893		607		945		662		897				1069
839		963		1163		293		1313		1310				1097
929		790		787		659		1066		760
825
921	1147	1046		768	1098	695		796	1077	795		1097	818	753
990	997	993		846	770	900		941	979	851		946	1106	966
815	882	1032		620	878	844		650	942	768		812	939	863
882	1050	1140		691	1043	988		961	950	883		1109	1054	1009
921		1028		445		771		624		741		945		1059
909		796		664		395		723		769		1133		1158
782		1028		388		665		527		546		915		1015
797		1021		703		898		756		871		874		1002
925		892		263		860		533		903		988		1084
795		770		494		968		699		737		926		1059
846		969		453		743		435		921		749		900
948		1023		473		834		547		859		992		911
649		715		234		679		363		794		706		711
701		843		278		833		529		875		699		932
1007		1005		635		686		844		791		1047		840
850		1008		465		631		746		852		1023		1049

## Sheet: C
Gal4 control	Gal4>UAS	UAS control		Gal4 control	Gal4>UAS	UAS control		Gal4 control	Gal4>UAS	UAS control		Gal4 control	Gal4>UAS	UAS control
929	627	924		931	303	623		921	412	727		1135	784	1071
801	689	852		1398	580	634		686	762	725		904	1055	1053
601	733	872		723	318	685		920	791	693		836	868	1097
610	590	900		789	393	267		938	585	470		937	790	909
869	627	989		1009	558	516			643	836			764	1096
	463	913			484	996			516	1061			822	1000
	766	937			407	561			637	951			771	874
	586	954			503	523			597	715			737	1073
	804	642			465	252			437	574			758	856
	748	910			534	634			583	730			854	920
	777				512				685				804
	620				225				465				798
	560				446				713				815
	815				650				772				940
	472				389				731				942
	735				334				469				712
814	803	935		435	843	848		753	1012	911		1098	1107	954
959	406	755		595	560	309		786	654	667		1069	728	919
681	619	980		484	706	832		716	815	1013		939	942	1049
826	812	952		699	597	958		805	790	964		1106	855	1184
691	606	933		520	478	886		469	781	878		1008	1028	840
875	866	866		506	661	569		877	854	1017		918	1043	1026
854	671	950		631	691	760		954	734	912		1038	881	1138
	853	859			767	551			945	666			937	1133
	703	596			578	292			777	518			907	1178
	467	832			650	655			882	841			1022	1095
	697	761			643	273			1015	705			1271	966
	993	649			1001	362			1099	649			1134	837
	679	632			538	316			917	521			966	939
	648	953			319	688			721	853			886	1149
	809				613				856				1005
	723				701				778				868
877	803	764		731	751	489		669	1050	669		793	1191	1174
779	721	678		515	525	177		582	731	397		1126	965	1079
883	785	738		575	557	220		992	667	282		1015	1077	995
965	848	869		497	672	421		854	909	484		1174	1013	884
835	871	772		392	946	172		674	946	402		1002	1030	893
957	561	970		922	583	700		948	793	678		1203	1036	1050
681	598	559		767	431	127		979	659	413		949	1143	1047
691	1051	570		613	1004	349		753	861	450		848	1142	983
920	673	907		747	237	557		842	560	621		1272	1343	1348
1025	647	836		832	427	551		1060	605	600		1248	1028	1236
923	691	724		639	457	219		725	638	313			1047	978
	654	869			896	628			513	841			888	1266
	987	824			625	460			615	608			1028	1148
		1002				735				1265			882	1387
		712				227				511				1145
		788				403				444				1176
741	790	1081		853	358	714		890	353	922		940	1037	1269
973	857	768		1111	726	368		1183	649	610		1211	998	1301
796	935	965		611	552	1107		769	709	712		993	1086	1172
907	942	950		799	520	627		1004	429	1081		1078	939	1277
1082	875	1182		968	368	920		1004	694	722		1172	739	1244
1045	954	938		994	507	706		1236	478	686		1301	1057	1249
1023	970	839		905	819	430		926	645	1028		1057	958	1274
1115	1232	1155		773	1098	983		806	1014	855		953	1145	1184
795	684	1143		830	608	808		1010	515	919		1088	726	1237
1083	747	1056		775	767	1092		935	931	852		1345	1159	1336
689	1018	966		880	941	563		905	1134	745		1125	1154	1194
866	1048	963		678	858	571		919	712	407		1045	957	1091
855	680	864		858	1065	1340		980	1106	997		1167	1042	1308
596	1063	518		602	870	273		828	1019	853		1101	1203	1107
1022	1046	796		888	739	933		1160	680			1238	1052
1192		750		907		520		930				1225
915	789	958		202	201	414		561	495	420		978	1327	1196
827	877	619		256	147	308		749	252	577		1291	1147	1276
1028	750	773		1071	175	396		487	434	571		1134	1293	1134
582	724	869		195	295	281		552	362	724		1122	1213	1276
680	735	759		78	247	554		848	391	727		1052	1247	1156
849	631	833		580	399	514		752	397	868		1037	1127	1357
806	505	1075		346	395	398		725	492	759		1255	1114	1174
748	605	905		217	400	483		627	958	665		1357	1372	996
668	830	877		254	371	648			632	837			1375	1204
	747	1013			517	921			490	890			1267	1162
	710	1167			184	729			797	843			1294	903
	820	971			200	358			649	721			1039	1244
	764	991			357	882			524	700			1148	1178
	758	998			208	815			524	778			1272	1184
	854	868			282	691			719	831			1328	985
	665	907			335				377				1187

## Sheet: D
Gal4 control	Gal4>UAS	UAS control		Gal4 control	Gal4>UAS	UAS control		Gal4 control	Gal4>UAS	UAS control		Gal4 control	Gal4>UAS	UAS control
929	862	1046		931	909	695		921	963	795		1135	965	753
801	789	993		1398	1021	900		686	886	851		904	1026	966
601	822	1032		723	669	844		920	694	768		836	850	863
610	920	1140		789	1034	988		938	850	883		937	895	1009
869	781	1028		1009	392	771			815	741			796	1059
	797	796			714	395			673	769			838	1158
	950	1028			932	665			960	546			1199	1015
	927	1021			970	898			1060	871			904	1002
	925	892			827	860			898	903			1118	1084
	737	770			630	968			852	737			892	1059
	950	969			1102	743			1096	921			1015	900
		1023				834				859				911
		715				679				794				711
		843				833				875				932
		1005				686				791				840
		1008				631				852				1049
814	983	640		435	671	722		753	1035	846		1098	981	908
959	725	817		595	904	930		786	931	1025		1069	1131	877
681	1153	915		484	1139	810		716	1200	793		939	1045	982
826	801	910		699	821	1004		805	953	1082		1106	1195	1036
691	1146	850		520	898	772		469	1332	834		1008	930	1135
875	832	853		506	980	660		877	1067	885		918	1165	1020
854	839	984		631	742	1270		954	831	1283		1038	1177	991
	1010	766			989	589			957	1001			1006	990
	640	820			814	714			1032	924			1090	896
	731	996			654	901			834	1211			1108	1159
	878	915			1072	1039			1106	1004			938	881
	894	801			937	958			1088	1009			1055	989
	947	839			1012	942			1095	1173			1086	902
	727	897			734	700			1032	925			1003	1080
	709	1090			601	1103			819	1294			898	1306
	817	865			1006	845			1031	1089				1029
877	909	1029		731	764	416		669	697	758		793	1102	1107
779	904	942		515	932	674		582	1032	783		1126	1193	783
883	921	1039		575	1063	634		992	1102	1171		1015	1204	1072
965	516	806		497	906	622		854	936	696		1174	1029	1088
835	1013	1052		392	832	687		674	900	921		1002	1097	1115
957	792	1032		922	803	694		948	895	1123		1203	1090	1129
681	985	911		767	1060	523		979	1036	868		949	990	1108
691	1005	1093		613	988	837		753	957	810		848	1014	1100
920	884	1098		747	620	893		842	702	1042		1272	901	1085
1025	1061	1054		832	1037	767		1060	1021	715		1248	1115	1120
923	725	849		639	889	759		725	927	870		1191	924	1167
	917	1083			881	780			1087	964			1059	1098
	997	975			417	582			696	792			1274	1043
	931	872			808	369			1037	662			1158	1082
	802	818			820	476			874	1081			884	937
	535	837			599	575			632	914			1129	1024
741	833	837		853	753	696		890	870	961		940	1087	1063
973	875	863		1111	599	651		1183	730	994		1211	1059	784
796	875	881		611	713	853		769	924	1009		993	1131	1024
907	877	1036		799	737	1009		1004	959	1139		1078	1179	1085
1082	706	1043		968	564	876		1004	740	1148		1172	1134	1159
1045	946	1040		994	773	829		1236	808	1014		1301	1172	995
1023	778	978		905	770	482		926	1160	977		1057	1094	1081
1115	641	907		773	605	743		806	645	880		953	989	1018
795	727	1010		830	669	896		1010	831	933		1088	1079	1038
1083	747	822		775	573	866		935	741	1137		1345	1142	922
689	919	1087		880	658	976		905	761	873		1125	1201	1119
866	1131	831		678	857	1006		919	784	1193		1045	1029	1017
855	819	1091		858	718	806		980	1032	1092		1167	884	936
596	857	1007		602	970	845		828	1005	1217		1101	1077	1155
1022	603	921		888	932	721		1160	1065	1084		1238	1009	1116
1192	864	1014		907	907	992		930	1041	880		1225	867	659
	804				956				1035
915	910	719		202	461	354		561	729	504		978	975	1142
827	889	726		256	671	815		749	783	972		1291	1232	1280
1028	840	683		1071	324	538		487	660	684		1134	1021	1083
582	905	725		195	751	798		552	602	865		1122	1042	1161
680	834	877		78	506	564		848	1001	807		1052	1208	1105
849	1016	734		580	831	678		752	919	706		1037	1109	1067
806	834	769		346	696	667		725	881	727		1255	1358	1227
748	848	780		217	563	491		627	837	870		1357	1215	1130
668	925	886		254	976	569			872	819			1262	1055
	950	789			843	559				674				1178
		811				522				740				1219
		893				945				897				1069
		963				293				1310				1097
		790				659				760

## Sheet: E
Gal4 control	Gal4>UAS	UAS control		Gal4 control	Gal4>UAS	UAS control		Gal4 control	Gal4>UAS	UAS control		Gal4 control	Gal4>UAS	UAS control
764	830	924		334	493	623		528	407	727		929	915	1071
681	530	852		247	793	634		404	1384	725		1020	1068	1053
	678	872			446	685			682	693			1011	1097
	850	900			563	267			605	470			796	909
	734	989			260	516			507	836			894	1096
	594	913			396	996			428	1061			729	1000
	794	937			717	561			595	951			805	874
	766	954			651	523			902	715			537	1073
	570	642			492	252			423	574			614	856
	533	910			154	634			268	730			879	920
	675				290				414

## Sheet: F
Gal4 control	Gal4>UAS	UAS control		Gal4 control	Gal4>UAS	UAS control		Gal4 control	Gal4>UAS	UAS control		Gal4 control	Gal4>UAS	UAS control
764	977	1046		334	691	695		528	952	795		929	1093	753
681	922	993		247	881	900		404	947	851		1020	1015	966
	862	1032			883	844			859	768			798	863
	854	1140			808	988			885	883			1017	1009
	970	1028			706	771			567	741			1068	1059
	582	796			777	395			706	769			1084	1158
	770	1028			691	665			898	546			1204	1015
		1021				898				871				1002
		892				860				903				1084
		770				968				737				1059
		969				743				921				900
		1023				834				859				911
		715				679				794				711
		843				833				875				932
		1005				686				791				840
		1008				631				852				1049
950	922	837		944	542	696		935	856	961		1191	1211	1063
759	1087	863		802	1017	651		917	949	994		1115	1175	784
883	1148	881		1076	946	853		1053	1109	1009		951	1242	1024
785	729	1036		1022	918	1009		1044	989	1139		1252	1020	1085
721	977	1043		777	916	876		851	1062	1148		1093	1090	1159
824	817	1040		883	824	829		884	950	1014		1193	1024	995
1119	1009	978		1038	1027	482		1077	1057	977		1217	1015	1081
869	881	907		742	702	743		973	757	880		1274	1120	1018
780	1106	1010		471	935	896		545	853	933		1163	1161	1038
966	722	822		896	771	866		1189	781	1137		1217	1016	922
	1000	1087			1012	976			1107	873			960	1119
		831				1006				1193				1017
		1091				806				1092				936
		1007				845				1217				1155
		921				721				1084				1116
		1014				992				880				659

## Sheet: G
Gal4 control	Gal4>UAS	UAS control		Gal4 control	Gal4>UAS	UAS control		Gal4 control	Gal4>UAS	UAS control		Gal4 control	Gal4>UAS	UAS control
700	820	1081		440	689	714		618	614	922		960	792	1269
947	663	768		913	507	368		1022	764	610		935	948	1301
832	829	965		842	747	1107		1042	971	712		877	942	1172
710	876	950		796	901	627		933	911	1081		909	1211	1277
893	877	1182		644	563	920		953	715	722		789	1085	1244
854	923	938		797	608	706		760	780	686		891	1091	1249
822	698	839		583	536	430		780	658	1028		860	1159	1274
689	919	1155		821	742	983		935	891	855		802	1078	1184
896	812	1143		872	551	808		978	698	919		1043	986	1237
655	820	1056		838	472	1092		832	617	852		792	1146	1336
	924	966			575	563			677	745			846	1194
	685	963			427	571			658	407			978	1091
	750	864			521	1340			682	997			889	1308
	935	518			625	273			741	853			1033	1107
	884	796			754	933			862				1198
	782	750			322	520			754				917

## Sheet: H
Gal4 control	Gal4>UAS	UAS control		Gal4 control	Gal4>UAS	UAS control		Gal4 control	Gal4>UAS	UAS control		Gal4 control	Gal4>UAS	UAS control
904	841	1046		691	828	695		771	806	795		905	848	753
646	907	993		730	693	900		687	816	851		1107	999	966
863	704	1032		871	719	844		706	829	768		988	845	863
857	799	1140		870	826	988		1043	797	883		897	856	1009
	494	1028			661	771			728	741			717	1059
	907	796			728	395			800	769			879	1158
	668	1028			963	665			1124	546			936	1015
	720	1021			750	898			857	871			887	1002
		892				860				903				1084
		770				968				737				1059
		969				743				921				900
		1023				834				859				911
		715				679				794				711
		843				833				875				932
		1005				686				791				840
		1008				631				852				1049
1000	969	837		440	1040	696		618	830	961		960	1102	1063
700	808	863		913	606	651		1022	773	994		935	1053	784
947	671	881		842	628	853		1042	785	1009		877	849	1024
832	949	1036		796	846	1009		933	921	1139		909	915	1085
710	1072	1043		644	844	876		953	935	1148		789	1080	1159
893	939	1040		797	835	829		760	855	1014		891	854	995
854	841	978		583	829	482		780	925	977		860	973	1081
822	712	907		821	910	743		935	1012	880		802	820	1018
689	965	1010		872	1126	896		978	1021	933		1043	980	1038
896	840	822		838	1015	866		832	1029	1137		792	912	922
655	865	1087			982	976			1021	873			852	1119
		831			1048	1006			1164	1193			1119	1017
		1091				806				1092				936
		1007				845				1217				1155
		921				721				1084				1116
		1014				992				880				659
