# Supplementary material for: Ecdysone acts through cortex glia to regulate sleep in Drosophila
Source: eLife. 2023 Jan 31;12:e81723. doi: 10.7554/eLife.81723 (PMC9928426; doi:10.7554/eLife.81723)
Supplement: Figure 6—source data 1. [file elife-81723-fig6-data1.xlsx]

## Sheet: Fig6C
Vehicle control	20E
39638	44560
42451	40343
49891	34347
32500	44798
46386	50899
40149	42846
47823	48845
47889	45816
46638	44621
59968	38342
51473	46293
51957	52521
55685	51449
46332	56910
55450	54785
60495	56500

## Sheet: Fig6D
Vehicle control	20E
36.309	34.76
35.0905	32.2813
35.7739	30.9127
38.0744	33.167
34.7422	30.5585
36.6091	33.4236
36.9526	36.9248
35.5261	35.5279
36.6288	32.9565
39.0601	34.403
35.5221	28.3994
38.1322	33.4731
33.8423	30.894
37.5424	35.8359
36.956	34.0197
36.1384	34.2214

## Sheet: Fig6E
Vehicle	20E
526	187.667
426.667	250.333
637	592
508.333	578
568.667	581.667
554	617
516	574
686
764.333	608
490.667	553.333
744	518.333
515.333	534
594.333	471
407.667	511
650	570.667
561.333	394
