# Supplementary material for: Ecdysone acts through cortex glia to regulate sleep in Drosophila
Source: eLife. 2023 Jan 31;12:e81723. doi: 10.7554/eLife.81723 (PMC9928426; doi:10.7554/eLife.81723)
Supplement: Figure 6—source data 2. [file elife-81723-fig6-data2.xlsx]

## Sheet: C
LD count			LD size
RU-	Ru+		RU-	Ru+
1.52326	1.31174		1.06526	1.02556
0.357609	1.5537		0.661518	1.1662
0.955652	1.46239		0.975229	1.17387
1.11696	1.19304		1.35733	0.911139
1.05609	0.757826		1.13016	0.700118
0.751739	1.36196		0.638098	1.10958
1.2387	1.13522		1.17241	1.07516
	1.21891			0.994955
0.888661	1.13876		0.953092	1.10002
0.898911	0.95221		0.996536	1.05526
1.29353	1.00858		0.952351	0.93462
1.10801	1.30583		0.967973	1.14933
0.795388	1.11826		0.964096	1.05287
0.840487	0.918386		1.00429	1.04853
1.13466	0.505317		1.06495	0.886102
1.04036	0.740038		1.09671	0.988897

## Sheet: D
LD count			LD size
0.664461	1.76371		0.669144	1.08929
1.4121	1.02458		0.780399	0.532648
0.569943	1.80151		1.00932	1.24169
0.810019	1.74386		0.926859	1.18956
0.982042	2.06711		1.18432	1.46141
1.20321	1.73819		1.21245	1.33063
1.35822			1.21751
0.916118	1.89407		1.01613	0.88958
0.877183	1.4406		1.01559	0.917269
0.959634	2.02462		1.01001	0.790297
0.971085	1.68108		1.06821	0.910662
1.2047	2.11394		0.952345	0.870961
0.760378	1.80475		0.883394	0.85042
1.23218	2.07043		1.05433	0.861291
1.07873	1.65588		0.879009	0.929161
