# Supplementary material for: Ecdysone acts through cortex glia to regulate sleep in Drosophila
Source: eLife. 2023 Jan 31;12:e81723. doi: 10.7554/eLife.81723 (PMC9928426; doi:10.7554/eLife.81723)
Supplement: Figure 6—source data 3. [file elife-81723-fig6-data3.xlsx]

## Sheet: Sheet1
Vehicle	Gab
527.333	1143.33
626.333	1056.67
695.667	901.667
716.667	927.333
606	1192
667	1195.33
685.667	1096.67
591.667	1144.67
653.667	1034
660	935
569.333	1098.67
1164.67	1062.33
691.667	1012.33
671.667	1051.67
716.333	1057
418.333	633.667
597.333	1176.67
945.333	834
601	927.667
431.333	1100.67
749.667	1037.33
586.333
690.333	989.333
745.333	1107.67
728.667	1035.33
620.333	1056
423.667	977.333
627	908
745.333	998.333
627.667	1221
	1010.33
	1164.33
613	1168.67
543.333	969
562.667	1201.33
715.333	1096
903.667	1270.33
665.333	1133
798
828.333
